# Supplementary material for: A taxonomic review of Aramides cajaneus (Aves, Gruiformes, Rallidae) with notes on morphological variation in other species of the genus
Source: Zookeys. 2015 Apr 27;(500):111–40. doi: 10.3897/zookeys.500.7685 (PMC4432243; doi:10.3897/zookeys.500.7685)
Supplement: Supplementary material 1 — Specimens examined [file zookeys-500-111-s001.xls]

## Sheet: Plan1
Collection and Number	Identification	Sex	Country	State/Province/Department	Locality	Latitude	Longitude	Notes
MCZ 139923	albiventris	m	Belize		Belize River	17.1833	-89.0667
MCZ 139924	albiventris	f	Belize		Belize River	17.1833	-89.0667
MCZ 139925	albiventris	f	Belize		Cayo Dist. - Mountain Cow	16.79	-89.05
CMNH 25131	albiventris	m	Belize		Forest near Manatee Lagoon	17.2	-88.38
CMNH 99943	albiventris	m	Belize		Meditation Rapids (Belize R.)	17.35	-88.72
CMNH 99944	albiventris	m	Belize		Meditation Rapids (Belize R.)	17.35	-88.72
CMNH 99945	albiventris	f	Belize		Meditation Rapids (Belize R.)	17.35	-88.72
CMNH 25106	albiventris	f	Belize		near Manatee lagoon	17.2	-88.38
CMNH 25142	albiventris	f	Belize		near Manatee lagoon	17.2	-88.38
CMNH 27555	albiventris	f	Belize		near Manatee lagoon	17.2	-88.38
CMNH 27744	albiventris	m	Belize		near Manatee lagoon	17.2	-88.38
CMNH 116941	albiventris	f	Belize		Sitte River, Freetown	17.2	-88.38
CMNH 117009	albiventris	m	Belize		Sitte River, Freetown	17.2	-88.38
MCZ 119745	albiventris		Belize		Sittee R.	16.8	-88.25
MCZ 119746	albiventris		Belize		Sittee R.	16.8	-88.25
BMNH 89.11.20.61	albiventris		Belize		Vicinity of Belize, Blancaneaux	17.05	-88.97
AMNH 45656	albiventris		Belize					syntype of A. albiventris
FMNH 411531	albiventris	f	Costa Rica		Alajuela, Quebrada Azul de San Carlos	10.4	-84.47
FMNH 411532	albiventris	m	Costa Rica		Alajuela, Quebrada Azul de San Carlos	10.4	-84.47
USNM 209872	albiventris	f	Costa Rica		Bonilla	10.02	-83.6
MCZ 116371	albiventris		Costa Rica		Cariblanco de Sarapiqui	10.2667	-84.1667
MCZ 116372	albiventris		Costa Rica		Carillo	10.15	-83.9167
FMNH 36032	albiventris	m	Costa Rica		Cartago, Guayabo	9.95	-83.65
CMNH 26828	albiventris		Costa Rica		GUACIMO (3 KM W; EL HOGAR)	9.93	-83.63
FMNH 401339	albiventris	m	Costa Rica		Guanacaste, Miravalles	10.6833	-85.2333
FMNH 401340	albiventris	f	Costa Rica		Guanacaste, Miravalles	10.6833	-85.2333
CMNH 13152	albiventris	m	Costa Rica		Guapiles	10.22	-83.78
USNM 113603	albiventris	m	Costa Rica		Jimenez	10.22	-83.73	holotype of A. plumbeicollis
USNM 115045	albiventris	f	Costa Rica		Jimenez	10.22	-83.73
AMNH 471958	albiventris		Costa Rica		Miravalles	10.6833	-85.2333
FMNH 30363	albiventris	f	Costa Rica		Puntarenas, El Pozo	8.97	-83.53
FMNH 403154	albiventris	f	Costa Rica		Vol. Turrialba, la Iberia Farm	10.0333	-83.7667
CMNH 13572	albiventris	f	Costa Rica		Volcan Turrialba (N slope)	10.0333	-83.7667
MCZ 149884	albiventris	f	El Salvador	Ahuachapan	Barra de Santiago	13.69	-90
UCLA 18750	albiventris	m	El Salvador	Ahuachapan	Barra de Santiago	13.69	-90	holotype of A. vanrossemi
MCZ 258225	albiventris		Guatemala	Peten	Tikal	17.23	-89.61
MCZ 258226	albiventris		Guatemala	Peten	Tikal	17.23	-89.61
AMNH 813160	albiventris	M	Guatemala	Santa Rosa	La Avellana	13.92	-90.47
USNM 33668	albiventris		Guatemala		Chiapam, Pacific Coast	14.2833	-91.9
BMNH 89.11.70.64	albiventris		Guatemala		Mouth of river Samala	14.3167	-92.3
AMNH 393515	albiventris	M	Guatemala		Ocos	14.51	-92.19
AMNH 393516	albiventris	F	Guatemala		Ocos	14.51	-92.19
AMNH 393517	albiventris	F	Guatemala		Ocos	14.51	-92.19
AMNH 393518	albiventris	F	Guatemala		Ocos	14.51	-92.19
MCZ 145736	albiventris	m	Guatemala		Ocos	14.51	-92.19
MCZ 145737	albiventris	f	Guatemala		Ocos	14.51	-92.19
USNM 396518	albiventris	f	Guatemala		Panzos	15.42	-89.22
FMNH 110121	albiventris		Guatemala		Peten, La Liberdad	16.78	-90.12
USNM ?	albiventris	m	Guatemala		Peten: Chuntuqui	17.53	-90.11
USNM ?	albiventris	f	Guatemala		Peten: Chuntuqui	17.53	-90.11
AMNH 471955	albiventris		Guatemala		Sources of R. de la Pasion	16	-9.01667
AMNH 45657	albiventris		Guatemala					syntype of A. albiventris
AMNH 325912	albiventris	M	Honduras	Olancho	El Boqueron, Catacamas	14.8	-85.9
AMNH 325913	albiventris	M	Honduras	Olancho	El Boqueron, Catacamas	14.8	-85.9
AMNH 325914	albiventris	M	Honduras	Olancho	El Boqueron, Catacamas	14.8	-85.9
AMNH 325915	albiventris	M	Honduras	Olancho	El Boqueron, Catacamas	14.8	-85.9
AMNH 325916	albiventris	F	Honduras	Olancho	El Boqueron, Catacamas	14.8	-85.9
FMNH 88414	albiventris		Honduras		Colon, Samboo R. NW of Trujillo	15.86	-86.28
FMNH 62483	albiventris		Honduras		Cortes, Lake Ticamaya	15.5	-87.8667
FMNH 97909	albiventris		Honduras		Cortes, Lake Ticamaya	15.5	-87.8667
CMNH 134940	albiventris	f	Honduras		Lake Yojoa	14.87	-87.98
CMNH 135168	albiventris	f	Honduras		Lake Yojoa	14.87	-87.98
CMNH 135169	albiventris	f im	Honduras		Lake Yojoa	14.87	-87.98
CMNH 135488	albiventris	f	Honduras		Lake Yojoa	14.87	-87.98
AMNH 471954	albiventris	M	Honduras		Mts. La Cumbre	14.5667	-89.1
FMNH 413633	albiventris	m	Honduras		Olancho, Catacamas, El Boqueron	14.8	-85.9
FMNH 413634	albiventris	f	Honduras		Olancho, Catacamas, El Boqueron	14.8	-85.9
FMNH 413635	albiventris	f	Honduras		Olancho, Catacamas, El Boqueron	14.8	-85.9
FMNH 413636	albiventris	m	Honduras		Olancho, Catacamas, El Boqueron	14.8	-85.9
FMNH 413637	albiventris	m	Honduras		Olancho, Catacamas, El Boqueron	14.8	-85.9
FMNH 413638	albiventris	f	Honduras		Olancho, Catacamas, El Boqueron	14.8	-85.9
CMNH 134363	albiventris	f	Honduras		Planes
CMNH 21588	albiventris		Honduras		Rio de las Piedras	15.47	-88.05
CMNH 21589	albiventris		Honduras		Rio de las Piedras	15.47	-88.05
CMNH 21590	albiventris		Honduras		Rio de las Piedras	15.47	-88.05
MCZ 158520	albiventris	m	Honduras		Subirana, depto. Yoro	15.2	-87.45
AMNH 325917	albiventris		Honduras
CMNH 142237	albiventris	f	Mexico	Campeche	7mi E. of Xpujil	18.5	-89.2833
CMNH 142238	albiventris	f	Mexico	Campeche	7mi E. of Xpujil	18.5	-89.2833
FMNH 120864	albiventris	m	Mexico	Campeche	Pacaitun	18.22	-91.08
CMNH 143297	albiventris		Mexico	Campeche	Zoh Laguna (ca. 25km NW)	18.59	-89.41
FMNH 414609	albiventris	f	Mexico	Chiapas	Escuintla, Acacoyagua	15.3333	-92.6333
FMNH 414610	albiventris	m	Mexico	Chiapas	Escuintla, Acacoyagua	15.3333	-92.6333
FMNH 414611	albiventris	f	Mexico	Chiapas	Escuintla, Acacoyagua	15.3333	-92.6333
FMNH 414612	albiventris	m	Mexico	Chiapas	Escuintla, Acacoyagua	15.3333	-92.6333
USNM 141541	albiventris	f	Mexico	Oaxaca	Guichicovi	16.97	-95.1
USNM 141540	albiventris	m	Mexico	Oaxaca	Huilotepec	16.23	-95.12
USNM 76990	albiventris		Mexico	Oaxaca	Santa Ifigenia	18.45	-94.1833
AMNH 776255	albiventris	M	Mexico	Oaxaca	Sarabia	17.08	-95.05
AMNH 776256	albiventris	F	Mexico	Oaxaca	Sarabia	17.08	-95.05
FMNH 415037	albiventris	m	Mexico	Oaxaca	Tutla, 20mi west of Tolosa	17.2833	-95.7167
FMNH 415038	albiventris	m	Mexico	Oaxaca	Tutla, 20mi west of Tolosa	17.2833	-95.7167
FMNH 415039	albiventris	m	Mexico	Oaxaca	Tutla, 20mi west of Tolosa	17.2833	-95.7167
MCZ 286422	albiventris	f	Mexico	Quintana Roo	Bacalar	18.67	-88.38
MCZ 286423	albiventris		Mexico	Quintana Roo	Bacalar	18.67	-88.38
MCZ 286421	albiventris	m	Mexico	Quintana Roo	Ucum	18.48	-88.48
USNM 371566	albiventris	m	Mexico	Tabasco	La Venta	18.01	-94.04
USNM 371567	albiventris	f	Mexico	Tabasco	La Venta	18.01	-94.04
USNM 371568	albiventris	f	Mexico	Tabasco	La Venta	18.01	-94.04
MCZ 111012	albiventris	f	Mexico	Tabasco
MCZ 111013	albiventris	m	Mexico	Tabasco
MCZ 102281	albiventris	f	Mexico	Vera Cruz	Buena Vista	17.8	-95.22	holotype of A. a. mexicanus
USNM 370639	albiventris	f	Mexico	Vera Cruz	Passo Nuevo	18.02	-94.45
USNM 141536	albiventris	f	Mexico	Vera Cruz	Tlacotalpan	18.62	-95.67
USNM 141537	albiventris	m	Mexico	Vera Cruz	Tlacotalpan	18.62	-95.67
USNM 141539	albiventris	f	Mexico	Vera Cruz	Tlacotalpan	18.62	-95.67
USNM 356787	albiventris	m	Mexico	Vera Cruz	Tres Zapotes	18.47	-95.45
USNM 356788	albiventris	m	Mexico	Vera Cruz	Tres Zapotes	18.47	-95.45
AMNH 471952	albiventris	M	Mexico	Vera Cruz	Vega del Casadero	20.03	-96.65
MCZ 102280	albiventris	m	Mexico	Veracruz	Buena Vista	17.8	-95.22
FMNH 417333	albiventris	m	Mexico	Veracruz	Ojochico	18.92	-96.82
BMNH 89.11.20.60	albiventris	F	Mexico	Yucatan	Cozumel I.	20.4167	-86.9167
FMNH 36589	albiventris		Mexico	Yucatan
USNM 132223	albiventris	F	Mexico	Yucatan
BMNH 91.11.4.160	albiventris		Mexico		Playa Vicente	17.8333	-95.8167
FMNH 13207	albiventris	f	Mexico		San Felipe, Yucatan	21.5667	-88.2167
MCZ 286424	albiventris		Mexico		Santa Clara	20.77	-87.88
MCZ 286425	albiventris		Mexico		Santa Clara	20.77	-87.88
MCZ 286426	albiventris		Mexico		Santa Clara	20.77	-87.88
AMNH 95829	albiventris	M	Mexico		Tampico, s. Tamaulipas	22.2167	-97.85
MCZ 32956	albiventris		Mexico		Yucatan
USNM 132222	albiventris		Mexico or Guatemala?
AMNH 143684	albiventris	M	Nicaragua	Managua	Tipitapa	12.2	-86.1	holotype of A. plu. pacificus
AMNH 103269	albiventris	F	Nicaragua		Jalapa	13.92	-86.13
AMNH 103271	albiventris	M	Nicaragua		Jalapa	13.92	-86.13
AMNH 143685	albiventris	F	Nicaragua		Los Sabalos, San Juan River	11.05	-84.4833
AMNH 305619	albiventris	F	Nicaragua		Matagalfa	12.8833	-85.7833
MCZ 94315	albiventris		Nicaragua		N. Nicaragua, Jalapa	13.92	-86.13
AMNH 103264	albiventris		Nicaragua		Northern Nicaragua
AMNH 103265	albiventris	M	Nicaragua		Rio Coco (Wanks River)	15	-83.1667
AMNH 103266	albiventris	M	Nicaragua		Rio Coco (Wanks River)	15	-83.1667
AMNH 103267	albiventris	F	Nicaragua		Rio Coco (Wanks River)	15	-83.1667
AMNH 103268	albiventris	F	Nicaragua		Rio Coco (Wanks River)	15	-83.1667
USNM 112254	albiventris	m	Nicaragua		Segovia R.	15	-83.1667
BMNH 91.11.4.189	albiventris	M	Nicarágua		Escondido River	12.15	-83.7667
MHNCI 187	avicenniae	F	Brazil	Paraná	Caiobá (Passagem)	-25.85	-48.55
BMNH 89.11.20.57	avicenniae	F	Brazil	Paraná	Rio do Boraxudo	-25.2667	-48.4333
MZUSP 69411	avicenniae	M	Brazil	São Paulo	Barra do Icapará	-24.6833	-47.4167
MZUSP 14967	avicenniae	M	Brazil	São Paulo	Cananéia, Cachoeirinha	-25.0167	-47.95
MZUSP 14969	avicenniae	M	Brazil	São Paulo	Cananéia, Morrete	-25.0167	-47.95
MZUSP 14970	avicenniae	M	Brazil	São Paulo	Cananéia, Morrete	-25.0167	-47.95
MZUSP 14968	avicenniae	F	Brazil	São Paulo	Cananéia, Tabatinguara	-25.0167	-47.95
MZUSP 14971	avicenniae	M	Brazil	São Paulo	Cananéia, Tabatinguara	-25.0167	-47.95
MZUSP 91802	avicenniae	M	Brazil	São Paulo	Cubatão, manguezal	-23.8667	-46.3833
MZUSP 66527	avicenniae		Brazil	São Paulo	Icapara	-24.6833	-47.4167
MZUSP 67212	avicenniae	M	Brazil	São Paulo	Icapara	-24.6833	-47.4167	holotype of A. c. avicenniae
MZUSP 68386	avicenniae	M	Brazil	São Paulo	Icapara	-24.6833	-47.4167
MZUSP 67213	avicenniae	F	Brazil	São Paulo	Iguape	-24.7167	-47.55
MNHN 1971.302	avicenniae	M	Brazil	São Paulo	Iguape (Icapara)	-24.6833	-47.4167
MNHN 1971.303	avicenniae	M	Brazil	São Paulo	Iguape (Icapara)	-24.6833	-47.4167
MNHN 1971.304	avicenniae	M	Brazil	São Paulo	Iguape (Icapara)	-24.6833	-47.4167
MNHN 1971.305	avicenniae	F	Brazil	São Paulo	Iguape (Icapara)	-24.6833	-47.4167
MNHN 1971.306	avicenniae	F	Brazil	São Paulo	Iguape (Icapara)	-24.6833	-47.4167
MNHN 1971.307	avicenniae	F	Brazil	São Paulo	Iguape (Icapara)	-24.6833	-47.4167
MZUSP 73724	avicenniae		Brazil	São Paulo	Ilha do Cardoso, litoral Sul	-25.1333	-47.9667
MZUSP 70639	avicenniae	F	Brazil	São Paulo	Rio Cachoeira Grande, Ilha do Cardoso	-25.1333	-47.9667
MZUSP 78725	avicenniae	F	Brazil	São Paulo	Santos, Sítio Sandi	-23.9167	-46.3
AMNH 778903	cajaneus		Argentina	Corrientes	Garruchos	-28.1833	-55.65
AMNH 792484	cajaneus	f	Argentina	Corrientes	Mercedes, Ea. Rincon del Ombú	-29.4667	-57.8333
AMNH 792480	cajaneus	m	Argentina	Corrientes	Torrent, barra del Cuay Chico	-28.7167	-56.4167
AMNH 792481	cajaneus	m	Argentina	Corrientes	Torrent, barra del Cuay Grande	-28.0667	-56.2833
AMNH 792483	cajaneus	f	Argentina	Corrientes	Torrent, barra del Cuay Grande	-28.0667	-56.2833
AMNH 792482	cajaneus	f	Argentina	Corrientes	Torrent, Monte del Cuay Chico	-28.7167	-56.4167
FMNH 402685	cajaneus	f	Argentina	Jujuy	Dept. Santa Barbara, Rio Lavallen	-24.2	-64.7167
FMNH 402686	cajaneus	m	Argentina	Jujuy	Dept. Santa Barbara, Rio Lavallen	-24.2	-64.7167
FMNH 422385	cajaneus	m	Argentina	Salta	Aguaray	-22.2667	-63.7333
BMNH 99.1.27.188	cajaneus	F	Argentina	Salta	Oran	-23.3333	-64.25
FMNH 422384	cajaneus	f	Argentina	Salta	Oran	-23.3333	-64.25
FMNH 402809	cajaneus	m	Argentina	Salta	Rio Bermejo
FMNH 422386	cajaneus	m	Argentina	Salta	Rio Seco, Oran	-22.87	-64.17
AMNH 819188	cajaneus	m	Bolivia	Beni	Rio Ibaré, 28km de la boca	-14.9333	-64.9333
AMNH 819189	cajaneus	f	Bolivia	Beni	Rio Ibaré, 28km de la boca	-14.9333	-64.9333
AMNH 136833	cajaneus	f	Bolivia	Cochabamba	Mission San. Antonio, Rio Chimore	-16.7167	-65.1167
MNHN 1960.147	cajaneus	M	Bolivia	Santa Cruz	Buena Vista, Ichilo	-17.45	-63.6667
MNHN 1960.148	cajaneus	M	Bolivia	Santa Cruz	Buena Vista, Ichilo	-17.45	-63.6667
MNHN 1960.149	cajaneus	M	Bolivia	Santa Cruz	Buena Vista, Ichilo	-17.45	-63.6667
MNHN 1960.150	cajaneus	F	Bolivia	Santa Cruz	Buena Vista, Ichilo	-17.45	-63.6667
CMNH 51100	cajaneus	m	Bolivia	Santa Cruz	Buenavista	-17.45	-63.6667
CMNH 86172	cajaneus	m	Bolivia	Santa Cruz	Buenavista	-17.45	-63.6667
CMNH 94527	cajaneus	f	Bolivia	Santa Cruz	Buenavista	-17.45	-63.6667
FMNH 178810	cajaneus	m	Bolivia	Santa Cruz	Buenavista	-17.45	-63.6667
FMNH 178811	cajaneus	f	Bolivia	Santa Cruz	Buenavista	-17.45	-63.6667
FMNH 178812	cajaneus	m	Bolivia	Santa Cruz	Rio Yapacani	-17.2833	-63.6667
FMNH 178809	cajaneus	m	Bolivia	Santa Cruz	San Carlos	-17.4	-63.75
FMNH 425481	cajaneus		Bolivia	Santa Cruz	Sansabá, Chiq.	-18.3167	-59.5667
FMNH 425401	cajaneus	m	Bolivia	Tarija	ca 30km (air) nw Yacuiba	-21.8	-63.8667
BMNH 1902.3.18.1974	cajaneus		Bolivia		Charuplaya	-17.3667	-66.75
CMNH 38357	cajaneus	f	Bolivia		prov. del Sara	-16.8333	-63.9167
CMNH 43919	cajaneus		Bolivia		prov. del Sara	-16.8333	-63.9167
AMNH 471991	cajaneus		Bolivia		Province of Sara
CMNH 32800	cajaneus	f	Bolivia		Santa Cruz d. l. s.	-17.8	-63.1667
CMNH 32995	cajaneus	m	Bolivia		Santa Cruz d. l. s.	-17.8	-63.1667
MPEG 61976	cajaneus	F	Brazil	Acre	Porto Walter, Igarapé Cruzeiro do Vale, Colônia Dois Portos	-8.33333	-72.6
MPEG 40725	cajaneus	F	Brazil	Acre	Rio Juruá, margem direita, São Salvador, próximo foz Rio Grajaú	-8.51667	-72.8333
MPEG 40726	cajaneus	M	Brazil	Acre	Rio Juruá, margem direita, São Salvador, próximo foz Rio Grajaú	-8.51667	-72.8333
MPEG 48035	cajaneus	M	Brazil	Acre	Rio Juruá, margem esquerda, Cruzeiro do Sul, Porangaba	-8.75	-72.8167
MPEG 60440	cajaneus	F	Brazil	Acre	Senador Guiomard, Ramal Nabor Júnior, km 26	-9.76667	-67.2167
MZUSP 37193	cajaneus	F	Brazil	Alagoas	Usina Sinimbu, Mangabeiras	-9.91667	-36.1333
MZUSP 37194	cajaneus	M	Brazil	Alagoas	Usina Sinimbu, Mangabeiras	-9.91667	-36.1333
MZUSP 37195	cajaneus	M	Brazil	Alagoas	Usina Sinimbu, Mangabeiras	-9.91667	-36.1333
MPEG 15213	cajaneus	M	Brazil	Amapá	Amapá	2.05	-50.8
MPEG 15214	cajaneus	M	Brazil	Amapá	Amapá	2.05	-50.8
MPEG 19810	cajaneus	F	Brazil	Amapá	Igarapé Capivara, afluente esquerdo Rio Araguari, Amapá	-1.05	-51.8333
MPEG 19808	cajaneus	F	Brazil	Amapá	Ilha Sta. Ana, Macapá	-0.05	-51.1833
MPEG 19809	cajaneus	F	Brazil	Amapá	Rio Araguari, Faz. Nova California, 80kmSE Ferreira Gomes	1	-50.75
MNRJ 45342	cajaneus	M	Brazil	Amapá	Rio Macacoari	0.283333	-50.7
MZUSP 69824	cajaneus	M	Brazil	Amazonas	Ilha Baruruá, Boca do Ati-Paraná	-2.51667	-67.3667
FMNH 418369	cajaneus	m	Brazil	Amazonas	Lábrea, R. Purus	-7.26667	-64.7833
FMNH 418370	cajaneus	m	Brazil	Amazonas	Lábrea, R. Purus	-7.26667	-64.7833
FMNH 418371	cajaneus	m	Brazil	Amazonas	Lábrea, R. Purus	-7.26667	-64.7833
FMNH 418372	cajaneus	f	Brazil	Amazonas	Lábrea, R. Purus	-7.26667	-64.7833
FMNH 418373	cajaneus	m	Brazil	Amazonas	Lábrea, R. Purus	-7.26667	-64.7833
INPA 558	cajaneus	F	Brazil	Amazonas	MD rio Uatumã, a 6km da foz do rio Pitinga	-1.53333	-59.6833
MZUSP 76729	cajaneus	M	Brazil	Amazonas	Paca, margem dir. do Rio Abacaxis	-4.58333	-58.2167
MZUSP 10608	cajaneus	M	Brazil	Amazonas	Parintins	-2.6	-56.7333
MZUSP 11892	cajaneus	M	Brazil	Amazonas	Parintins	-2.6	-56.7333
MZUSP 22378	cajaneus	F	Brazil	Amazonas	Rio Amazonas (N), Igarapé Anibá	-2.91667	-58.55
MZUSP 21974	cajaneus	F	Brazil	Amazonas	Rio Amazonas (norte) Silves	-2.9	-58.45
MZUSP 22009	cajaneus	F	Brazil	Amazonas	Rio Amazonas (norte) Silves	-2.9	-58.45
MZUSP 22259	cajaneus	F	Brazil	Amazonas	Rio Amazonas (norte) Silves	-2.9	-58.45
MZUSP 22286	cajaneus	F	Brazil	Amazonas	Rio Amazonas (norte) Silves	-2.9	-58.45
MZUSP 22289	cajaneus	M	Brazil	Amazonas	Rio Amazonas (norte), Lago Camaçary	-2.95	-58.25
MZUSP 22291	cajaneus	M	Brazil	Amazonas	Rio Amazonas (S), Lago Baptista	-3.3	-58.25
MZUSP 20923	cajaneus	M	Brazil	Amazonas	Rio Amazonas (sul) Lago do Batista	-3.3	-58.25
MZUSP 21803	cajaneus	F	Brazil	Amazonas	Rio Amazonas (sul) Lago do Batista	-3.3	-58.25
MZUSP 21804	cajaneus	F	Brazil	Amazonas	Rio Amazonas (sul) Lago do Batista	-3.3	-58.25
MZUSP 21825	cajaneus	M	Brazil	Amazonas	Rio Amazonas (sul) Lago do Batista	-3.3	-58.25
MZUSP 21914	cajaneus	M	Brazil	Amazonas	Rio Amazonas (sul) Lago do Batista	-3.3	-58.25
MZUSP 21975	cajaneus	F	Brazil	Amazonas	Rio Amazonas (sul) Lago do Batista	-3.3	-58.25
MZUSP 22008	cajaneus	F	Brazil	Amazonas	Rio Amazonas (sul) Lago do Batista	-3.3	-58.25
MZUSP 22288	cajaneus	F	Brazil	Amazonas	Rio Amazonas (sul) Lago do Batista	-3.3	-58.25
MNRJ 21342	cajaneus	M	Brazil	Amazonas	Rio Amazonas (sul), Lago do Baptista	-3.3	-58.25
MNRJ 21343	cajaneus	M	Brazil	Amazonas	Rio Amazonas (sul), Lago do Baptista	-3.3	-58.25
MNRJ 21344	cajaneus	F	Brazil	Amazonas	Rio Amazonas (sul), Lago do Baptista	-3.3	-58.25
MNRJ 21345	cajaneus	M	Brazil	Amazonas	Rio Amazonas (sul), Lago do Baptista	-3.3	-58.25
MZUSP 21760	cajaneus	M	Brazil	Amazonas	Rio Amazonas, Itacoatiara	-3.13333	-58.4167
MZUSP 21761	cajaneus	M	Brazil	Amazonas	Rio Amazonas, Lago Camaçari	-2.95	-58.25
MZUSP 21903	cajaneus	M	Brazil	Amazonas	Rio Amazonas, Lago Camaçari	-2.95	-58.25
MZUSP 21977	cajaneus	M	Brazil	Amazonas	Rio Amazonas, Lago Camaçari	-2.95	-58.25
MZUSP 22006	cajaneus	M	Brazil	Amazonas	Rio Amazonas, Lago Camaçari	-2.95	-58.25
MZUSP 22285	cajaneus	F	Brazil	Amazonas	Rio Amazonas, Lago Tapayuna	-3.38333	-58.2667
MPEG 18291	cajaneus	F	Brazil	Amazonas	Rio Javari, Estirão do Ecuador	-4.53333	-71.6
MPEG 18529	cajaneus	F	Brazil	Amazonas	Rio Javari, Estirão do Ecuador	-4.53333	-71.6
MZUSP 22256	cajaneus	F	Brazil	Amazonas	Rio Juruá, João Pessoa	-6.66667	-69.8667
MZUSP 22258	cajaneus	F	Brazil	Amazonas	Rio Juruá, João Pessoa	-6.66667	-69.8667
MZUSP 22290	cajaneus	M	Brazil	Amazonas	Rio Juruá, João Pessoa	-6.66667	-69.8667
MZUSP 21976	cajaneus	M	Brazil	Amazonas	Rio Juruá, Rio Eiru, Santa Cruz	-6.7	-69.8667
FMNH 407480	cajaneus	m	Brazil	Amazonas	Rio Manacapuru	-3.05	-61.6167
FMNH 407481	cajaneus	f	Brazil	Amazonas	Rio Manacapuru	-3.05	-61.6167
MZUSP 86410	cajaneus	M	Brazil	Amazonas	Rio Parauari, 4 Km abaixo da cachoeira do Tambor, margem direita	-4.96667	-58.0167
FMNH 412045	cajaneus	f	Brazil	Amazonas	Rio Purus, Canutama	-6.53333	-64.3333
FMNH 412046	cajaneus	m	Brazil	Amazonas	Rio Purus, Lábrea	-7.26667	-64.7833
MZUSP 28044	cajaneus	F	Brazil	Amazonas	Silves	-2.9	-58.45
MNRJ 29462	cajaneus		Brazil	Amazonas	Tapuruquara, Rio Negro	-0.4	-65.0333
MZUSP 14559	cajaneus	M	Brazil	Bahia	Corupeba, perto de Maria de Deus (mangues)	-12.7167	-38.6
MZUSP 32927	cajaneus	M	Brazil	Bahia	Ilhéus	-14.8167	-39.0333
MZUSP 32928	cajaneus	m im	Brazil	Bahia	Ilhéus	-14.8167	-39.0333
MZUSP 32929	cajaneus	F	Brazil	Bahia	Ilhéus	-14.8167	-39.0333
MZUSP 32930	cajaneus	m im	Brazil	Bahia	Ilhéus	-14.8167	-39.0333
BMNH 1906.12.21.148	cajaneus	M	Brazil	Bahia	Itaparica I.	-13	-38.7
BMNH 1906.12.21.149	cajaneus	F	Brazil	Bahia	Itaparica I.	-13	-38.7
MZUSP 14560	cajaneus	F	Brazil	Bahia	Rio Gongogy	-14.3	-39.4167
AMNH 241195	cajaneus	m	Brazil	Bahia	Santa Ritta	-11	-44.5333
AMNH 241196	cajaneus	m	Brazil	Bahia	Santa Ritta	-11	-44.5333
FMNH 46845	cajaneus	f	Brazil	Bahia	Sao Marcello	-11.0333	-45.5333
AMNH 471973	cajaneus		Brazil	Bahia
MZUSP 41349	cajaneus	F	Brazil	Ceará	Faz. Poço Verde, Itapipoca	-3.5	-39.5833
FMNH 45265	cajaneus	m	Brazil	Ceará	Jua. Near Iguatu	-6.36667	-39.3
MNRJ 19102	cajaneus	F	Brazil	Espirito Santo	Lauro Muller, Pau Gigante	-19.8333	-40.3667
MNRJ 19103	cajaneus	M	Brazil	Espirito Santo	Lauro Muller, Pau Gigante	-19.8333	-40.3667
MNRJ 19104	cajaneus	F	Brazil	Espirito Santo	Lauro Muller, Pau Gigante	-19.8333	-40.3667
MNRJ 19105	cajaneus	M	Brazil	Espirito Santo	Lauro Muller, Pau Gigante	-19.8333	-40.3667
MNRJ 25133	cajaneus		Brazil	Espirito Santo	Linhares, Lagoa de Dentro	-19.25	-39.9333
MNRJ 32860	cajaneus	M	Brazil	Espirito Santo	Norte de Linhares
MNRJ 32861	cajaneus	F	Brazil	Espirito Santo	Norte de Linhares
MNRJ 23255	cajaneus	M	Brazil	Espirito Santo	Pau Gigante	-19.8333	-40.3667
AMNH 139907	cajaneus	f	Brazil	Espirito Santo	Rio Doce	-19.6167	-39.8167
MNRJ 26662	cajaneus	M	Brazil	Espirito Santo	São José
MBML 2262	cajaneus	M	Brazil	Espírito Santo	Brejo Grande, Linhares	-19.4167	-40.0667
MBML 2267	cajaneus	M	Brazil	Espírito Santo	Brejo Grande, Linhares	-19.4167	-40.0667
MBML 2264	cajaneus	F	Brazil	Espírito Santo	Jataí Peba, Linhares	-19.4167	-40.0667
MBML 2265	cajaneus	F	Brazil	Espírito Santo	Jataí Peba, Linhares	-19.4167	-40.0667
MBML 2266	cajaneus	F	Brazil	Espírito Santo	Lagoa do Bráz, Linhares	-19.4167	-40.0667
MBML 2263	cajaneus	F	Brazil	Espírito Santo	Lagoa Juparanã, Linhares	-19.5833	-40.3
MBML 2268	cajaneus	F	Brazil	Espírito Santo	Lagoa Nova, Linhares	-19.4167	-40.0667
MZUSP 6422	cajaneus	M	Brazil	Espírito Santo	ND
MZUSP 24552	cajaneus	M	Brazil	Espírito Santo	Pau Gigante	-19.8333	-40.3667
MZUSP 32926	cajaneus	M	Brazil	Espírito Santo	Pau Gigante	-19.8333	-40.3667
MZUSP 6423	cajaneus	F	Brazil	Espírito Santo	Rio Doce	-19.6167	-39.8167
MZUSP 28084	cajaneus	F	Brazil	Espírito Santo	Rio São José	-19.5833	-40.3
MBML 7351	cajaneus	M	Brazil	Espírito Santo	Rodosol, Guarapari	-20.6667	-40.5
MZUSP 32925	cajaneus	F	Brazil	Espírito Santo	Vila Velha, Morro de Argolas	-20.3333	-40.2833
MNRJ 21346	cajaneus	M	Brazil	Goiás	Anápolis	-16.3333	-48.9667
MNRJ 21348	cajaneus	M	Brazil	Goiás	Anápolis	-16.3333	-48.9667
MNRJ 21350	cajaneus	F	Brazil	Goiás	Anápolis	-16.3333	-48.9667
MNRJ 21351	cajaneus	M	Brazil	Goiás	Anápolis	-16.3333	-48.9667
MNRJ 32881	cajaneus	M	Brazil	Goiás	Anápolis	-16.3333	-48.9667
MNRJ 32882	cajaneus	F	Brazil	Goiás	Anápolis	-16.3333	-48.9667
MNRJ 32883	cajaneus	M	Brazil	Goiás	Anápolis	-16.3333	-48.9667
AMNH 798707	cajaneus	m im	Brazil	Goiás	Annapolis	-16.3333	-48.9667
AMNH 798708	cajaneus	f im	Brazil	Goiás	Annapolis	-16.3333	-48.9667
AMNH 798709	cajaneus	f im	Brazil	Goiás	Annapolis	-16.3333	-48.9667
AMNH 798710	cajaneus	m im	Brazil	Goiás	Annapolis	-16.3333	-48.9667
AMNH 798712	cajaneus	m	Brazil	Goiás	Annapolis	-16.3333	-48.9667
AMNH 798713	cajaneus	f im	Brazil	Goiás	Annapolis	-16.3333	-48.9667
AMNH 798714	cajaneus	f	Brazil	Goiás	Annapolis	-16.3333	-48.9667
AMNH 798715	cajaneus	m	Brazil	Goiás	Annapolis	-16.3333	-48.9667
AMNH 798716	cajaneus	f	Brazil	Goiás	Annapolis	-16.3333	-48.9667
AMNH 798718	cajaneus	f	Brazil	Goiás	Annapolis	-16.3333	-48.9667
AMNH 7987xx	cajaneus	f subad	Brazil	Goiás	Annapolis	-16.3333	-48.9667
MZUSP 34967	cajaneus	F	Brazil	Goiás	Município de Goiás	-15.9333	-50.1333
MPEG 44458A	cajaneus	M	Brazil	Goiás	Nerópolis, Faz. Dois Irmãos	-16.4167	-49.2333
MPEG 44459A	cajaneus	M	Brazil	Goiás	Nerópolis, Faz. Dois Irmãos	-16.4167	-49.2333
MPEG 44460	cajaneus	F	Brazil	Goiás	Nerópolis, Faz. Dois Irmãos	-16.4167	-49.2333
MZUSP 74282	cajaneus		Brazil	Goiás	Niquelândia, marg esq do Rio do Peixe	-14.1	-50.85
MNHN 1943.1	cajaneus	M	Brazil	Goiás	Pilar	-14.6833	-49.45
MNHN 1943.2	cajaneus	F	Brazil	Goiás	Pilar	-14.6833	-49.45
FMNH 408645	cajaneus	m	Brazil	Goiás	Rio Sao Miguel, nr. Cavalcanti	-13.8	-47.5
FMNH 408646	cajaneus	f	Brazil	Goiás	Rio Sao Miguel, nr. Cavalcanti	-13.8	-47.5
FMNH 408647	cajaneus	f	Brazil	Goiás	Rio Sao Miguel, nr. Cavalcanti	-13.8	-47.5
MNRJ 6714	cajaneus	M	Brazil	Goiás	Veadeiros	-14.1167	-47.5167
FMNH 400618	cajaneus	f	Brazil	Maranhao	Boa Vista	-2.55	-43.2333
FMNH 403198	cajaneus	f	Brazil	Maranhao	Codo Cocos hr. Caxias	-4.58333	-43.6667
AMNH 241194	cajaneus	f	Brazil	Maranhao	Estiva (ilha Sao Luiz)	-2.75	-44.3333
AMNH 241197	cajaneus	m	Brazil	Maranhao	Sao Joao dos Patos	-6.5	-43.7
MZUSP 6854	cajaneus	M	Brazil	Maranhão	Boa Vista	-2.55	-43.2333
MPEG 50725	cajaneus		Brazil	Maranhão	Cantanhede, Palmeiral	-3.61667	-44.3667
MPEG 15915	cajaneus	M	Brazil	Maranhão	Imperatriz	-5.45	-47.5
MPEG 42245	cajaneus	F	Brazil	Maranhão	Riachão, Povoado Feira Nova, Fazenda do Arroz	-6.95	-46.6833
MNRJ 45340	cajaneus	M	Brazil	Mato Grosso	Alto Rio São Lourenço, Pixoréu	-15.8333	-54.3833
MNRJ 45341	cajaneus	F	Brazil	Mato Grosso	Alto Rio São Lourenço, Pixoréu	-15.8333	-54.3833
MNRJ 15974	cajaneus		Brazil	Mato Grosso	Barreiro, Alto Cuiabá	-14.4833	-55.8
AMNH 34809	cajaneus	m	Brazil	Mato Grosso	Chapada	-15.4333	-55.75
AMNH 34810	cajaneus	m	Brazil	Mato Grosso	Chapada	-15.4333	-55.75
AMNH 34811	cajaneus	f	Brazil	Mato Grosso	Chapada	-15.4333	-55.75
AMNH 58674	cajaneus	m	Brazil	Mato Grosso	Chapada	-15.4333	-55.75
BMNH 89.1.10.52	cajaneus		Brazil	Mato Grosso	Chapada	-15.4333	-55.75
MNRJ 2679	cajaneus		Brazil	Mato Grosso	Chapada	-15.4333	-55.75
MNRJ 2693	cajaneus	F	Brazil	Mato Grosso	Chapada	-15.4333	-55.75
ZMB 1997/244	cajaneus	M	Brazil	Mato Grosso	Cuiabá	-15.5833	-56.0833
FMNH 64358	cajaneus	f	Brazil	Mato Grosso	Descalvados	-16.75	-57.7
MNRJ 32558	cajaneus	F	Brazil	Mato Grosso	Diauarim, Alto Xingu	-11.2	-53.2333
MZUSP 79250	cajaneus	M	Brazil	Mato Grosso	Faz. Descalvados, camp. 1	-16.7	-57.7333
MZUSP 79251	cajaneus	F	Brazil	Mato Grosso	Faz. Descalvados, camp. 2	-16.7333	-57.7167
MZUSP 78127	cajaneus	M	Brazil	Mato Grosso	Faz. Ipê, Vila Rica	-10	-51.1
MZUSP 78128	cajaneus	F	Brazil	Mato Grosso	Faz. Ipê, Vila Rica	-10	-51.1
MNRJ 33636	cajaneus	F	Brazil	Mato Grosso	Faz. Pantanalzinho, 13km NW Porto Esperidião	-15.75	-58.3833
MNRJ 15976	cajaneus		Brazil	Mato Grosso	Foz do Castanha	-7.58333	-60.3333
FMNH 64359	cajaneus	m	Brazil	Mato Grosso	Lago Gaiba	-17.75	-57.7167
MZUSP 30089	cajaneus	F	Brazil	Mato Grosso	Rio Aricá, Fazenda Aricá	-15.95	-55.9333
MNRJ 15972	cajaneus		Brazil	Mato Grosso	Rio Arinos	-10.4167	-58.3333
MZUSP 17064	cajaneus	M	Brazil	Mato Grosso	Usina Santo Antônio, Cuiabá	-15.8667	-56.0833
MNRJ 15970	cajaneus	F	Brazil	Mato Grosso / Mato Grosso do Sul	Alto Cuyaba
MZUSP 10095	cajaneus	M	Brazil	Mato Grosso do Sul	Corumbá	-19.0167	-57.65
MNRJ 39655	cajaneus	M	Brazil	Mato Grosso do Sul	Faz. Rabicho	-19.1167	-57.4167
MZUSP 17063	cajaneus	M	Brazil	Mato Grosso do Sul	Fazenda Recreio, Coxim	-17.65	-56.75
MNRJ 21347	cajaneus	F	Brazil	Mato Grosso do Sul	Maracaju	-21.6333	-54.9667
MNRJ 21349	cajaneus	F	Brazil	Mato Grosso do Sul	Maracaju	-21.6333	-54.9667
MNRJ 21352	cajaneus	M	Brazil	Mato Grosso do Sul	Maracaju	-21.6333	-54.9667
MCZ 154536	cajaneus	m	Brazil	Mato Grosso do Sul	Miranda	-20.2333	-56.3667
MZUSP 12306	cajaneus	M	Brazil	Mato Grosso do Sul	Miranda	-20.2333	-56.3667
BMNH 1910.7.9.111	cajaneus	M	Brazil	Mato Grosso do Sul	Pau de Azucar, alto Paraguay	-21.4	-57.85
MNRJ 22498	cajaneus		Brazil	Mato Grosso do Sul	Porto Quebracho	-21.8333	-57.8833
MNRJ 22501	cajaneus	M	Brazil	Mato Grosso do Sul	Porto Quebracho	-21.8333	-57.8833
MNRJ 22699	cajaneus	M	Brazil	Mato Grosso do Sul	Porto Quebracho	-21.8333	-57.8833
MNRJ 19866	cajaneus	M	Brazil	Mato Grosso do Sul	Rio Ivinhima	-23.2333	-53.7
MZUSP 30090	cajaneus	F	Brazil	Mato Grosso do Sul	Rio Paraguay, Corumbá	-19.0167	-57.65
MNRJ 20113	cajaneus	M	Brazil	Mato Grosso do Sul	Salobra	-20.1667	-56.5167
MNRJ 20114	cajaneus	M	Brazil	Mato Grosso do Sul	Salobra	-20.1667	-56.5167
MNRJ 22880	cajaneus		Brazil	Mato Grosso do Sul	Salobra	-20.1667	-56.5167
MZUSP 18309	cajaneus	M	Brazil	Mato Grosso do Sul	Salobra	-20.1667	-56.5167
MZUSP 18310	cajaneus	F	Brazil	Mato Grosso do Sul	Salobra	-20.1667	-56.5167
MZUSP 26541	cajaneus	F	Brazil	Mato Grosso do Sul	Salobra	-20.1667	-56.5167
MZUSP 26542	cajaneus	M	Brazil	Mato Grosso do Sul	Salobra	-20.1667	-56.5167
AMNH 127258	cajaneus	m	Brazil	Mato Grosso do Sul	Urucum, near Corumba	-19.15	-57.6333
AMNH 127259	cajaneus	m	Brazil	Mato Grosso do Sul	Urucum, near Corumba	-19.15	-57.6333
AMNH 127260	cajaneus	f	Brazil	Mato Grosso do Sul	Urucum, near Corumba	-19.15	-57.6333
AMNH 127261	cajaneus		Brazil	Mato Grosso do Sul	Urucum, near Corumba	-19.15	-57.6333
MNRJ 34721	cajaneus	M	Brazil	Minas Gerais	Coromandel	-18.4667	-47.2
MNRJ 33460	cajaneus	F	Brazil	Minas Gerais	Governador Valadares	-18.85	-41.9333
MNRJ 33461	cajaneus	M	Brazil	Minas Gerais	Governador Valadares	-18.85	-41.9333
MZUSP 7774	cajaneus	M	Brazil	Minas Gerais	Mayrink	-17.7833	-40.4833
MZUSP 7775	cajaneus	F	Brazil	Minas Gerais	Mayrink	-17.7833	-40.4833
MZUSP 8342	cajaneus	M	Brazil	Minas Gerais	Pirapora	-17.35	-44.9333
MZUSP 8480	cajaneus		Brazil	Minas Gerais	Pirapora	-17.35	-44.9333
AMNH 471969	cajaneus	f	Brazil	Minas Gerais	Rio Jordao	-18.4333	-48.1
AMNH 471968	cajaneus	m	Brazil	Minas Gerais	Rio Jordao, Araguary	-18.4333	-48.1
MZUSP 8481	cajaneus	M	Brazil	Minas Gerais	Rio São Francisco, Pirapora	-17.35	-44.9333
MNRJ 15876	cajaneus	F	Brazil	Pará	"Faro, Zool."
MZUSP 64245	cajaneus	M	Brazil	Pará	Baixo Rio Xingú, margem direita	-1.5	-51.55
MZUSP 11928	cajaneus	F	Brazil	Pará	Belem, Murutucu	-1.45	-48.4833
CMNH 69174	cajaneus	m	Brazil	Pará	Benevides, Bragança R. R.	-1.36667	-48.25
MNRJ 25131	cajaneus	M	Brazil	Pará	captivity ?
MNRJ 28517	cajaneus	F	Brazil	Pará	captivity ?
MZUSP 58126	cajaneus	M	Brazil	Pará	Fordlândia, Rio Tapajós (leste)	-3.66667	-55.5
MZUSP 60505	cajaneus	M	Brazil	Pará	Fordlândia, Rio Tapajós (leste)	-3.66667	-55.5
MZUSP 66072	cajaneus		Brazil	Pará	Fordlândia, Rio Tapajós (leste)	-3.66667	-55.5
MZUSP 68855	cajaneus	M	Brazil	Pará	Fordlândia, Rio Tapajós (leste)	-3.66667	-55.5
AMNH 285623	cajaneus	F	Brazil	Pará	Igarapé Bravo, Rio Tapajós	-1.95	-55.1833
AMNH 285624	cajaneus	F	Brazil	Pará	Igarapé Bravo, Rio Tapajós	-1.95	-55.1833
MPEG 32295	cajaneus	M	Brazil	Pará	Igarapé Pedral, afluente direito Rio Guamá, Ourém, km 24, Sítio Fé em Deus	-1.83333	-47.05
MPEG 47668	cajaneus	M	Brazil	Pará	Igarapé Pucuruizinho, Tucuruí, BR 422 km 67	-3.95	-49.7167
MNRJ 15975	cajaneus	F	Brazil	Pará	Ilha de Marajó	-1	-49.5
MNRJ 29811	cajaneus	F	Brazil	Pará	Ilha de Marajó, Faz. Maria Paña	-1.01667	-48.9667
MZUSP 35890	cajaneus	M	Brazil	Pará	Jaquara	-2.2	-54.4
FMNH 418379	cajaneus	m	Brazil	Pará	Lago Cuitena, R. Amazonas	-1.9	-55.5333
FMNH 418376	cajaneus	f	Brazil	Pará	Lago Cuiteua, R. Amazonas	-1.9	-55.5333
FMNH 418377	cajaneus	m	Brazil	Pará	Lago Cuiteua, R. Amazonas	-1.9	-55.5333
FMNH 418378	cajaneus	m	Brazil	Pará	Lago Cuiteua, R. Amazonas	-1.9	-55.5333
FMNH 418375	cajaneus	m	Brazil	Pará	Lirchel, R. Amazonas, R. Tapajós
FMNH 418380	cajaneus	f	Brazil	Pará	Lirchel, R. Amazonas, R. Tapajós
MNRJ 2680	cajaneus		Brazil	Pará	Marajó	-1	-49.5
MPEG 31583	cajaneus	F	Brazil	Pará	Marajó, Cachoeira do Arari, Fazenda Vencedora	-1.2	-48.0833
MPEG 31580	cajaneus	M	Brazil	Pará	Marajó, Ponta de Pedras, Fazenda São Joaquim, Rio Ananindeua	-1.38333	-48.8667
MPEG 2287	cajaneus	F	Brazil	Pará	Mexiana, Boca do Igarapé Pinto	-0.0833333	-49.5167
FMNH 402810	cajaneus	m	Brazil	Pará	Murutucu, Border of Rio Guama	-1.45	-48.4833
FMNH 411156	cajaneus	f	Brazil	Pará	Rio Acara, Buenos Ayres	-1.91667	-48.4167
FMNH 411154	cajaneus	f	Brazil	Pará	Rio Acara, Serraria Cabral	-2.06667	-48.4
FMNH 411155	cajaneus	f	Brazil	Pará	Rio Acara, Serraria Cabral	-2.06667	-48.4
MZUSP 21913	cajaneus	M	Brazil	Pará	Rio Amazonas (norte), Igarapé Buiussú	-1.91667	-55.45
MZUSP 15719	cajaneus	F	Brazil	Pará	Rio Amazonas (Norte), Patauá	-0.166667	-49
MZUSP 15720	cajaneus	M	Brazil	Pará	Rio Amazonas (Norte), Patauá	-0.166667	-49
FMNH 410692	cajaneus	f	Brazil	Pará	Rio Amazonas, Lago Cuipeua	-1.9	-55.5333
FMNH 410693	cajaneus	m	Brazil	Pará	Rio Amazonas, Lago Cuipeua	-1.9	-55.5333
FMNH 410694	cajaneus	m	Brazil	Pará	Rio Amazonas, Lago Cuipeua	-1.9	-55.5333
FMNH 410695	cajaneus	f	Brazil	Pará	Rio Amazonas, Lago Cuipeua	-1.9	-55.5333
FMNH 410696	cajaneus	f	Brazil	Pará	Rio Amazonas, Lago Cuipeua	-1.9	-55.5333
FMNH 410697	cajaneus	f	Brazil	Pará	Rio Amazonas, Lago Cuipeua	-1.9	-55.5333
FMNH 411153	cajaneus	m	Brazil	Pará	Rio Capim, Ipomonga	-3.06667	-47.9333
FMNH 422569	cajaneus		Brazil	Pará	Rio Tapajós (L), Fordlandia	-3.66667	-55.5
MZUSP 20450	cajaneus	M	Brazil	Pará	Rio Tapajós (leste) Caxiricatuba	-2.83333	-55.1333
MZUSP 20451	cajaneus	M	Brazil	Pará	Rio Tapajós (leste) Caxiricatuba	-2.83333	-55.1333
MZUSP 21480	cajaneus	M	Brazil	Pará	Rio Tapajós (leste) Caxiricatuba	-2.83333	-55.1333
MZUSP 21805	cajaneus	F	Brazil	Pará	Rio Tapajós (leste) Caxiricatuba	-2.83333	-55.1333
MZUSP 21900	cajaneus	F	Brazil	Pará	Rio Tapajós (leste) Caxiricatuba	-2.83333	-55.1333
MZUSP 21927	cajaneus	M	Brazil	Pará	Rio Tapajós (leste) Caxiricatuba	-2.83333	-55.1333
MZUSP 21978	cajaneus	F	Brazil	Pará	Rio Tapajós (leste) Caxiricatuba	-2.83333	-55.1333
MZUSP 22287	cajaneus	M	Brazil	Pará	Rio Tapajós (leste) Caxiricatuba	-2.83333	-55.1333
MZUSP 22292	cajaneus	F	Brazil	Pará	Rio Tapajós (leste) Caxiricatuba	-2.83333	-55.1333
MZUSP 22457	cajaneus	F	Brazil	Pará	Rio Tapajós (leste) Caxiricatuba	-2.83333	-55.1333
MZUSP 20913	cajaneus	M	Brazil	Pará	Rio Tapajós (Leste) Piquiatuba	-2.55	-54.71
MZUSP 21807	cajaneus	F	Brazil	Pará	Rio Tapajós (Leste) Piquiatuba	-2.55	-54.71
MZUSP 22007	cajaneus	M	Brazil	Pará	Rio Tapajós (Leste) Piquiatuba	-2.55	-54.71
MZUSP 22257	cajaneus	M	Brazil	Pará	Rio Tapajós (Leste) Piquiatuba	-2.55	-54.71
FMNH 410473	cajaneus	m	Brazil	Pará	Rio Tapajós, Boim	-2.81667	-55.1667
MPEG 40728	cajaneus	M	Brazil	Pará	Rio Tapajós, margem direita, Caxiricatuba	-2.83333	-55.1333
FMNH 411092	cajaneus	f	Brazil	Pará	Rio Tapajós, Pinhel	-2.91667	-55.2333
FMNH 411093	cajaneus	m	Brazil	Pará	Rio Tapajós, Pinhel	-2.91667	-55.2333
FMNH 410474	cajaneus	f	Brazil	Pará	Rio Tapajós, Santarém	-2.43333	-54.7
FMNH 410475	cajaneus	m	Brazil	Pará	Rio Tapajós, Santarém	-2.43333	-54.7
FMNH 410042	cajaneus	f	Brazil	Pará	Rio Tapajós, Tauary	-3.08333	-55.1
FMNH 410043	cajaneus	m	Brazil	Pará	Rio Tapajós, Tauary	-3.08333	-55.1
FMNH 410044	cajaneus	m	Brazil	Pará	Rio Tapajós, Tauary	-3.08333	-55.1
MPEG 36329	cajaneus	F	Brazil	Pará	Rio Tocantins, Tucuruí, Ilha Tocantins (ponta sul/ 75km S 18km N)	-4.41	-49.53
MPEG 55326	cajaneus	F	Brazil	Pará	Rio Xingu, margem esquerda, Altamira, UHE Belo Monte	-3.36667	-51.9167
MPEG 55327	cajaneus	F	Brazil	Pará	Rio Xingu, margem esquerda, Altamira, UHE Belo Monte	-3.36667	-51.9167
MZUSP 89864	cajaneus		Brazil	Pará	Santana do Araguaia, Fazenda Fartura	-9.73333	-50.4
MNRJ 25310	cajaneus	M	Brazil	Pará	Santarém	-2.43333	-54.7
MNRJ 27524	cajaneus	F	Brazil	Pará	Santarém	-2.43333	-54.7
MZUSP 11889	cajaneus	M	Brazil	Pará	Taperinha	-2.53333	-54.2833
FMNH 418374	cajaneus		Brazil	Pará	Tauary, R. Amazonas, R. Tapajós	-3.08333	-55.1
AMNH 285630	cajaneus	F	Brazil	Pará	Tauary, Rio Tapajós	-3.08333	-55.1
AMNH 285631	cajaneus	F	Brazil	Pará	Tauary, Rio Tapajós	-3.08333	-55.1
AMNH 285632	cajaneus	f	Brazil	Pará	Tauary, Rio Tapajós	-3.08333	-55.1
AMNH 285633	cajaneus	f	Brazil	Pará	Tauary, Rio Tapajós	-3.08333	-55.1
MNRJ 15873	cajaneus	F	Brazil	Pará	Utinga	-1.45	-48.4833
MNRJ 15874	cajaneus	F	Brazil	Pará	Utinga	-1.45	-48.4833
MZUSP 12068	cajaneus	M	Brazil	Pará	Utinga	-1.45	-48.4833
MZUSP 39442	cajaneus	M	Brazil	Paraíba	Coremas	-7.01667	-37.9667
MZUSP 39443	cajaneus	M	Brazil	Paraíba	Coremas	-7.01667	-37.9667
MHNCI 350	cajaneus		Brazil	Paraná	Ilha do Rio Paraná
MHNCI 3111	cajaneus	M	Brazil	Paraná	Ilha Grande, Altônia	-23.75	-54.05
MHCNI 2281	cajaneus	M	Brazil	Paraná	Passeio Público
MZUSP 36717	cajaneus	M	Brazil	Paraná	Rio Paracaí	-23.75	-53.5667
MZUSP 36718	cajaneus	M	Brazil	Paraná	Rio Paracaí	-23.75	-53.5667
MHCNI 1262	cajaneus	F	Brazil	Paraná	Rio Paraná
MHNCI 878	cajaneus	M	Brazil	Paraná	Rio Paranapanema	-22.6333	-53
MNRJ 28515	cajaneus	M	Brazil	Rio de Janeiro	captivity ?
MNRJ 23571	cajaneus	F	Brazil	Rio de Janeiro	Distrito Federal	-22.9	-43.2333
MNRJ 33428	cajaneus	M	Brazil	Rio de Janeiro	Itaoca, distrito de São Gonçalo, Niterói	-22.7667	-43.05
MNRJ 21835	cajaneus	M	Brazil	Rio de Janeiro	Rio de Janeiro	-22.9	-43.2333
ZMB 13143	cajaneus	M	Brazil	Rio de Janeiro	Rio de Janeiro	-22.9	-43.2333
MNRJ 15978	cajaneus	F	Brazil	Rio Grande do Sul	Passo da Cruz	-30.2667	-57.3167
MZUSP 76574	cajaneus		Brazil	Rondonia	E.E. Antônio Mujica Nava	-9.4	-64.9333
MZUSP	cajaneus	F	Brazil	Rondônia	MD Rio Madeira, Abunã, T10	-9.58333	-65.3667
MPEG 40727	cajaneus	F	Brazil	Rondônia	Rio Guaporé, Guajará-Mirim	-10.7667	-65.3333
MZUSP 55760	cajaneus	M	Brazil	Roraima	Baixo Mucajai, ao Sul de Boa Vista, Rio Branco	2.41667	-60.8667
MPEG 16374	cajaneus	M	Brazil	Roraima	Baixo Rio Mucajaí, Caracaraí	1.83333	-61.1333
MZUSP 26543	cajaneus	M	Brazil	São Paulo	Barra do Rio Dourado	-21.3667	-49.6833
MZUSP 10492	cajaneus	F	Brazil	São Paulo	Ilha Alcatrazes	-24.1167	-45.7
MZUSP 10493	cajaneus	M	Brazil	São Paulo	Ilha Alcatrazes	-24.1167	-45.7
MZUSP 63644	cajaneus	F	Brazil	São Paulo	Ilha dos Buzios, Litoral Norte	-23.8	-45.1333
MZUSP 63645	cajaneus	F	Brazil	São Paulo	Ilha dos Buzios, Litoral Norte	-23.8	-45.1333
MZUSP 63646	cajaneus	M	Brazil	São Paulo	Ilha dos Buzios, Litoral Norte	-23.8	-45.1333
MZUSP 63647	cajaneus	M	Brazil	São Paulo	Ilha dos Buzios, Litoral Norte	-23.8	-45.1333
MZUSP 63648	cajaneus	M	Brazil	São Paulo	Ilha dos Buzios, Litoral Norte	-23.8	-45.1333
MZUSP 63947	cajaneus	F	Brazil	São Paulo	Ilha dos Buzios, Litoral Norte	-23.8	-45.1333
MZUSP 6574	cajaneus	F	Brazil	São Paulo	Ilha Victoria	-23.75	-45.0167
MZUSP 4995	cajaneus	M	Brazil	São Paulo	Itapura	-20.6667	-51.5167
MZUSP 4997	cajaneus	F	Brazil	São Paulo	Itapura	-20.6667	-51.5167
MZUSP 4998	cajaneus	F	Brazil	São Paulo	Itapura	-20.6667	-51.5167
MZUSP 8183	cajaneus	F	Brazil	São Paulo	Ituverava	-20.3333	-47.7833
MZUSP 31862	cajaneus	F	Brazil	São Paulo	Porto Marcondes, Rio Paranapanema	-22.5333	-52.0333
MZUSP 31863	cajaneus	F	Brazil	São Paulo	Porto Marcondes, Rio Paranapanema	-22.5333	-52.0333
MZUSP 31864	cajaneus	M	Brazil	São Paulo	Porto Marcondes, Rio Paranapanema	-22.5333	-52.0333
MZUSP 4665	cajaneus	M	Brazil	São Paulo	Rio Grande, Barretos	-20.55	-48.55
MZUSP 5550	cajaneus	F	Brazil	São Paulo	Ubatuba	-23.4333	-45.0667
MPEG 21925	cajaneus	F	Brazil	Tocantins	Araguatins	-5.65	-48.1167
MCZ 177110	cajaneus	f	Brazil	Tocantins	Barra do Rio São Domingos	-12.5	-48.2333
MNRJ 6715	cajaneus	M	Brazil	Tocantins	Lagoa Grande vao do Paranã	-12.6167	-47.8667
MNHN 1969.432	cajaneus	M	Brazil	Tocantins	Macaúba, Ilha do Bananal	-10.5167	-50.5
MNRJ 15871	cajaneus		Brazil	Tocantins	Rio Paraná, Lagoa Grande	-12.6167	-47.8667
MNHN 2003.1253	cajaneus	M	Brazil		"S. Brazilia"
AMNH 285625	cajaneus	m	Brazil		Aramanay, rio Tapajos	-2.75	-55.1833
AMNH 285626	cajaneus	m	Brazil		Aramanay, rio Tapajos	-2.75	-55.1833
BMNH 89.11.20.55	cajaneus		Brazil		Bahia
BMNH 89.11.30.56	cajaneus		Brazil		Bahia
BMNH 94.2.20.3	cajaneus		Brazil		Bahia
ZMB 1997/241	cajaneus		Brazil		Bahia
MNRJ 32561	cajaneus	F	Brazil		Cachimbo	-8.95	-54.9
AMNH 285627	cajaneus	m	Brazil		Caxiricatuba, rio Tapajos	-2.83333	-55.1333
MNRJ 26661	cajaneus	M	Brazil		Cupido	-19.0667	-40.1333
AMNH 284805	cajaneus	M	Brazil		Faro, Rio Jamundá, Lago Uaicury, R. Amazon, N. bank	-2.18333	-56.7333
CMNH 75889	cajaneus	f	Brazil		Goyana Island, Tapajós River	-4.68333	-56.3833
AMNH 285615	cajaneus	m	Brazil		Igarape Bravo, rio Tapajos	-1.95	-55.1833
AMNH 285616	cajaneus	m	Brazil		Igarape Bravo, rio Tapajos	-1.95	-55.1833
AMNH 285617	cajaneus	m	Brazil		Igarape Bravo, rio Tapajos	-1.95	-55.1833
AMNH 285618	cajaneus	m	Brazil		Igarape Bravo, rio Tapajos	-1.95	-55.1833
AMNH 285619	cajaneus	f	Brazil		Igarape Bravo, rio Tapajos	-1.95	-55.1833
AMNH 285620	cajaneus	f	Brazil		Igarape Bravo, rio Tapajos	-1.95	-55.1833
AMNH 285621	cajaneus	f	Brazil		Igarape Bravo, rio Tapajos	-1.95	-55.1833
AMNH 285622	cajaneus	f	Brazil		Igarapé Bravo, Rio Tapajós	-1.95	-55.1833
AMNH 281212	cajaneus	m	Brazil		Lago Miguel, Rosarinho, Rio Madeira	-5.86667	-61.3833
CMNH 98132	cajaneus	f	Brazil		Manacapuru, Rio Solimões	-3.3	-60.6167
MNRJ 15875	cajaneus		Brazil		Marajó	-1	-49.5
CMNH 84334	cajaneus	f	Brazil		Óbidos, Islands, Amazon River
BMNH 45.8.25.56	cajaneus		Brazil		Pará			holotype of A. c. grahami
AMNH 278942	cajaneus	m	Brazil		R. Madeira, Auará Igarapé	-4.55	-59.8667
AMNH 278943	cajaneus	f	Brazil		R. Madeira, Auará Igarapé	-4.55	-59.8667
AMNH 278944	cajaneus	f	Brazil		R. Madeira, Auará Igarapé	-4.55	-59.8667
AMNH 278941	cajaneus	m	Brazil		R. Madeira, Borba	-4.4	-59.5833
AMNH 280430	cajaneus	f im	Brazil		R. Madeira, Sto. Antonio alic Harayana
MCZ 156776	cajaneus		Brazil		Rio Alto Paraná
MNRJ 32559	cajaneus	F	Brazil		Rio Arraia	-11.1667	-53.5833
AMNH 471971	cajaneus	f	Brazil		Rio Madeira, Allianca	-8.61667	-63.5333
AMNH 471970	cajaneus	m	Brazil		Rio Madeira, Humaytha	-7.51667	-63.0333
AMNH 280431	cajaneus	f	Brazil		Rio Madeira, Sto. Antonio de Guajará	-7.51667	-63.0333
AMNH 280432	cajaneus	f	Brazil		Rio Madeira, Sto. Antonio de Guajará	-4.33333	-59.7667
CMNH 105572	cajaneus	f	Brazil		Rio Manacapuru	-3.05	-61.6167
AMNH 311631	cajaneus	m	Brazil		Rio Negro, Cacaó Pereira Igarapé	-3.13333	-60.0833
AMNH 311632	cajaneus	f	Brazil		Rio Negro, Cacaó Pereira Igarapé	-3.13333	-60.0833
AMNH 430200	cajaneus	M	Brazil		Rio Tocantins, Baião	-2.68333	-49.6833
AMNH 430201	cajaneus	M	Brazil		Rio Tocantins, Baião	-2.68333	-49.6833
AMNH 430202	cajaneus	F	Brazil		Rio Tocantins, Baião	-2.68333	-49.6833
AMNH 281109	cajaneus	m	Brazil		Rosarinho, lago Sampaio, rio Madeira	-3.7	-59.1333
AMNH 281207	cajaneus	m	Brazil		Rosarinho, lago Sampaio, rio Madeira	-3.7	-59.1333
AMNH 281208	cajaneus	m	Brazil		Rosarinho, lago Sampaio, rio Madeira	-3.7	-59.1333
AMNH 281210	cajaneus	m	Brazil		Rosarinho, lago Sampaio, rio Madeira	-3.7	-59.1333
AMNH 281211	cajaneus	f	Brazil		Rosarinho, lago Sampaio, rio Madeira	-3.7	-59.1333
AMNH 798720	cajaneus	m	Brazil		S. Matto Grosso, Maracajú	-21.6333	-54.9667
AMNH 798721	cajaneus	m im	Brazil		S. Matto Grosso, Maracajú	-21.6333	-54.9667
AMNH 798722	cajaneus	m	Brazil		S. Matto Grosso, Maracajú	-21.6333	-54.9667
AMNH 798723	cajaneus	m	Brazil		S. Matto Grosso, Maracajú	-21.6333	-54.9667
CMNH 72046	cajaneus	f	Brazil		Santarém, Amazon river	-2.43333	-54.7
CMNH 72107	cajaneus	m im	Brazil		Santarém, Amazon river	-2.43333	-54.7
CMNH 72144	cajaneus	m	Brazil		Santarém, Amazon river	-2.43333	-54.7
CMNH 72899	cajaneus	f	Brazil		Santarém, Amazon river	-2.43333	-54.7
CMNH 73193	cajaneus	f	Brazil		Santarém, Amazon river	-2.43333	-54.7
MCZ 111339	cajaneus		Brazil		Santarém, Amazon river	-2.43333	-54.7
MNRJ 15969	cajaneus		Brazil		São Luis de ??? (Jacobina)	-16.25	-57.5667
AMNH 429051	cajaneus	f	Brazil		Tapará, rio Xingu	-1.63333	-52.0833
AMNH 429052	cajaneus	f	Brazil		Tapará, rio Xingu	-1.63333	-52.0833
AMNH 285628	cajaneus	m	Brazil		Tauary, rio Tapajos	-3.08333	-55.1
AMNH 285629	cajaneus		Brazil		Tauary, rio Tapajos	-3.08333	-55.1
AMNH 471972	cajaneus	f	Brazil		Teffé, Rio Solimoes	-3.36667	-64.7
BMNH 89.11.20.58	cajaneus	F	Brazil		Upper Amazons	-3.31667	-60.35
AMNH 277495	cajaneus	F	Brazil		Villa Bella Imperatriz, Lago Andirá, R. Amazon, s. bank	-2.83333	-56.9333
AMNH 278512	cajaneus	M	Brazil		Villa Bella Imperatriz, Serra de Parintins, R. Amazon, s. bank	-2.6	-56.7333
AMNH 278513	cajaneus	m	Brazil		Villa Bella Imperatriz, Serra de Parintins, R. Amazon, s. bank	-2.6	-56.7333
AMNH 278514	cajaneus	M	Brazil		Villa Bella Imperatriz, Serra de Parintins, R. Amazon, s. bank	-2.6	-56.7333
AMNH 278516	cajaneus	f	Brazil		Villa Bella Imperatriz, Serra de Parintins, R. Amazon, s. bank	-2.6	-56.7333
AMNH 278517	cajaneus	f	Brazil		Villa Bella Imperatriz, Serra de Parintins, R. Amazon, s. bank	-2.6	-56.7333
AMNH 278518	cajaneus		Brazil		Villa Bella Imperatriz, Serra de Parintins, R. Amazon, s. bank	-2.6	-56.7333
AMNH 276561	cajaneus	f	Brazil		Villa Bella Imperatriz, Sta. Clara, R. Amazon, s. bank	-2.6	-56.7333
AMNH 276562	cajaneus	F	Brazil		Villa Bella Imperatriz, Sta. Clara, R. Amazon, s. bank	-2.6	-56.7333
AMNH 276568	cajaneus	M	Brazil		Villa Bella Imperatriz, Sta. Clara, R. Amazon, s. bank	-2.6	-56.7333
AMNH 278515	cajaneus	f	Brazil		Villa Bella Imperatriz, Sta. Clara, R. Amazon, s. bank	-2.6	-56.7333
MNRJ 15879	cajaneus		Brazil
MNRJ 2678	cajaneus		Brazil
MLS 657	cajaneus	F	Colombia	Caquetá	Florencia	1.6	-75.6
MLS 658	cajaneus	F	Colombia	Caquetá	Montanita	1.5	-75.4667
AMNH 96337	cajaneus	f	Colombia	Choco	Atrato River
AMNH 96338	cajaneus	f	Colombia	Choco	Atrato River
AMNH 96339	cajaneus	m	Colombia	Choco	Atrato River
CMNH 43234	cajaneus	m	Colombia	Magdalena	Trojas de Lataca	10.7667	-74.3833
MLS 654	cajaneus	F	Colombia	Meta	Pachaquiaro	4.05	-73.15
MLS 656	cajaneus	F	Colombia	Meta	San Antonio, S. de San Martin	4.03333	-73.4167
AMNH 798719	cajaneus	f	Colombia	Meta	Villavicencio	4.15	-73.6167
FMNH 417072	cajaneus		Colombia		Antioquia, Neche	8.11667	-74.7667
FMNH 417073	cajaneus	f	Colombia		Antioquia, Neche	8.11667	-74.7667
FMNH 417074	cajaneus	m	Colombia		Antioquia, Neche	8.11667	-74.7667
FMNH 409274	cajaneus	f	Colombia		Antioquia, Remedios	7.03333	-74.6833
FMNH 423030	cajaneus	m	Colombia		Arauca, Bojabá	6.96667	-72
AMNH 45653	cajaneus		Colombia		Bogota	4.58333	-74.0667
MNHN 1955.487	cajaneus		Colombia		Bogotá?
AMNH 121407	cajaneus	f	Colombia		Buena Vista (above Villavicencio), E. Andes	4.16667	-73.6833
FMNH 400619	cajaneus	f	Colombia		Cali	3.45	-76.5167
FMNH 415886	cajaneus	m	Colombia		Caqueta, Morelia	1.51667	-75.6833
FMNH 415887	cajaneus	m?	Colombia		Caqueta, Morelia	1.51667	-75.6833
FMNH 415599	cajaneus	f	Colombia		Choco, Rio Jurado	7.1	-77.7667
FMNH 415600	cajaneus	m	Colombia		Choco, Rio Jurado	7.1	-77.7667
FMNH 415748	cajaneus	f	Colombia		Choco, Rio Jurado	7.1	-77.7667
FMNH 415749	cajaneus	f	Colombia		Choco, Rio Jurado	7.1	-77.7667
FMNH 415750	cajaneus	m	Colombia		Choco, Rio Jurado	7.1	-77.7667
FMNH 415747	cajaneus	f	Colombia		Choco, Rio Jurado (upper)	7.1	-77.7667
AMNH 115699	cajaneus	f	Colombia		Florencia, Caqueta	1.6	-75.6
AMNH 115700	cajaneus	f	Colombia		Florencia, Caqueta	1.6	-75.6
CMNH 49567	cajaneus	f	Colombia		Fundación	10.5167	-74.1833
CMNH 49582	cajaneus	m	Colombia		Fundación	10.5167	-74.1833
AMNH 121408	cajaneus	m	Colombia		Honda, Magdalena River	5.2	-74.75
AMNH 121409	cajaneus		Colombia		Honda, Magdalena River	5.2	-74.75
BMNH 89.11.20.51	cajaneus		Colombia		Interior of New Granada
MLS 653	cajaneus	F	Colombia		La Javilla, N. de Cuenta
MLS 655	cajaneus	M	Colombia		La Realidad, S. de Villavicencio
CMNH 41922	cajaneus	f	Colombia		La Tigresa, Santa Marta	11.17	-74.15
FMNH 425576	cajaneus	m	Colombia		Meta, Carinagua	4.58333	-71.0333
FMNH 419491	cajaneus	f	Colombia		Meta, La Macarena, Rio Guapaya	2.75	-73.9167
FMNH 419492	cajaneus	f?	Colombia		Meta, San Luis de Arama, Los Micos	3.28333	-73.8833
FMNH 419493	cajaneus	f	Colombia		Meta, San Luis de Arama, Los Micos	3.28333	-73.8833
FMNH 419494	cajaneus	m	Colombia		Meta, San Luis de Arama, Plaza Bonita	3.26667	-73.8667
AMNH 73270	cajaneus	m	Colombia		Minca	11.15	-74.1167
FMNH 424991	cajaneus	f	Colombia		Mocoa, Putumayo	1.15	-76.6167
BMNH 89.11.20.50	cajaneus	M	Colombia		Remédios, Antioquia	7.03333	-74.6833	holotype of A. c. salmoni
AMNH 71639	cajaneus	m	Colombia		Rio Cauca
AMNH 460077	cajaneus	f	Colombia		Rio Duda (Duita), Mt. Macarena	2.75	-73.9167
AMNH 460078	cajaneus	f	Colombia		Rio Duda (Duita), Mt. Macarena	2.75	-73.9167
AMNH 111312	cajaneus	f	Colombia		Rio Frio, Cauca River, Cauca	4.15	-76.3
AMNH 111313	cajaneus	m	Colombia		Rio Frio, Cauca River, Cauca	4.15	-76.3
AMNH 113328	cajaneus	f	Colombia		River Salaqui, Choco	7.45	-77.1167
MCZ 141837	cajaneus		Colombia		Santa Marta, Rio Frio	4.15	-76.3
AMNH 786902	cajaneus	m	Colombia		Upper Rio Sinu, mouth of Rio Nain, south Dep. Cordoba	9.4	-75.8167
MNHN 1925.79	cajaneus		Colombia		Villavicencio	4.15	-73.6167
AMNH 471992	cajaneus		Colombia
AMNH 471993	cajaneus		Colombia
AMNH 471994	cajaneus		Colombia
AMNH 471995	cajaneus		Colombia
CMNH 29037	cajaneus	m	Costa Rica	Puntarenas	Buenos Aires	9.16667	-83.3333
CMNH 11446	cajaneus	f	Costa Rica	Puntarenas	POZO AZUL DE PIRRIS	9.65	-84.2
ZMB 2000/13266	cajaneus		Costa Rica		"Hochebene" ?
MCZ 118027	cajaneus		Costa Rica		Boruca	9	-83.32
AMNH 389035	cajaneus	m	Costa Rica		Buenos Aires	9.16667	-83.3333
AMNH 389037	cajaneus	m im	Costa Rica		Buenos Aires	9.16667	-83.3333
AMNH 471957	cajaneus	M	Costa Rica		Buenos Aires	9.16667	-83.3333
USNM 15407	cajaneus	m	Costa Rica		Buenos Ayres	9.16667	-83.3333
AMNH 707828	cajaneus	m	Costa Rica		Canas Gordas	8.8	-83.05
AMNH 389036	cajaneus	M	Costa Rica		Orotina	9.9	-84.53
FMNH 407564	cajaneus	m	Costa Rica		Ozo Peninsula, Pt. Jimenez	8.53	-83.32
CMNH 155070	cajaneus	m	Costa Rica		Paquera (Nicoya)
MCZ 116373	cajaneus		Costa Rica		Pirris, Pozo Azul	9.65	-84.2
MCZ 116374	cajaneus		Costa Rica		Pirris, Pozo Azul	9.65	-84.2
CMNH 25578	cajaneus	f	Costa Rica		Pozo Azul, Pirris	9.65	-84.2
FMNH 6939	cajaneus	m	Costa Rica		Puntarenas, Buenos Aires	9.16667	-83.3333
FMNH 30364	cajaneus	m	Costa Rica		Puntarenas, El Pozo	8.97	-83.53
BMNH 1949.58.62	cajaneus	M	Costa Rica		Rio Machuca	9.88333	-84.65
CMNH 24020	cajaneus	f	Costa Rica		Talamanca	9.5	-83.67
MCZ 26511	cajaneus		Costa Rica		Talamanca	9.5	-83.67
MNHN 2003.1256	cajaneus		Costa Rica
BMNH 1953.68.56	cajaneus	M	Ecuador	Oriente	Rio Villano	-1.46667	-76.95
FMNH 408024	cajaneus	f	Ecuador		Oriente, Concepcion	-0.8	-77.4167
FMNH 408025	cajaneus	m	Ecuador		Oriente, Raya-Yaco	-0.633333	-77.3167
MCZ 137748	cajaneus		Ecuador		Rio Curaray, Voca	-2.36667	-74.0833
MCZ 137749	cajaneus		Ecuador		Rio Curaray, Voca	-2.36667	-74.0833
MNHN 1938.694	cajaneus	M	Ecuador		Rio Pastaza, Andoas	-2.56667	-76.8
AMNH 185257	cajaneus	m	Ecuador		Rio Suno Abajo	-0.7	-77.1333
MNHN 1975.1053	cajaneus	F	French Guyana		Saül	3.61667	-53.2
MNHN 1964.633	cajaneus	M	French Guyana		Sophie	3.97	-53.48
CMNH 62244	cajaneus	f	French Guyana		Tamanoir, Mana river	5.15	-53.75
CMNH 62245	cajaneus	m im	French Guyana		Tamanoir, Mana river	5.15	-53.75
MNHN 1997.769	cajaneus	M	French Guyana		Trois Sauts	2.25	-52.88
BMNH 1922.3.5.399	cajaneus		Guyana		Abary River	6.55	-57.7333
BMNH 1922.3.5.390	cajaneus		Guyana		Anarica River	6.03333	-58.5667
AMNH 804829	cajaneus		Guyana		Bart. Dist.	6.4	-58.6167
AMNH 804828	cajaneus	m im	Guyana		Bartica	6.4	-58.6167	nestling
BMNH 89.11.20.52	cajaneus	F	Guyana		Bartica Grove	6.4	-58.6167
BMNH 89.11.20.53	cajaneus	M	Guyana		Bartica Grove	6.4	-58.6167
MNHN 2003.1254	cajaneus	M	Guyana		Bartica Grove	6.4	-58.6167
FMNH 43905	cajaneus	f	Guyana		Berbice	6.4	-58.6167
AMNH 471883	cajaneus		Guyana		Camacusa	5.95	-59.9
AMNH 471985	cajaneus		Guyana		Demerara	6.8	-58.1667
AMNH 471986	cajaneus		Guyana		Demerara	6.8	-58.1667
AMNH 471987	cajaneus		Guyana		Demerara	6.8	-58.1667
FMNH 413185	cajaneus	m	Guyana		Essequibo River, Rockstone	5.98333	-58.55
FMNH 413186	cajaneus	f	Guyana		Essequibo River, Rockstone	5.98333	-58.55
FMNH 32193	cajaneus	m	Guyana		Georgetown	6.4	-58.6167
BMNH 1922.3.5.383	cajaneus		Guyana		Ituribisi River	7.08333	-58.4833
AMNH 176804	cajaneus		Guyana		Kamakusa	5.95	-59.9
AMNH 804830	cajaneus	f	Guyana		Kartabo	6.38333	-58.6833
AMNH 804831	cajaneus		Guyana		Kartabo	6.38333	-58.6833
AMNH 804832	cajaneus	m	Guyana		Kartabo	6.38333	-58.6833
BMNH não fotografei o número	cajaneus	M	Guyana		Moco-Moco, Kanuku Mts., Rupununi	3.33333	-59.65
FMNH 108075	cajaneus	m	Guyana		Rockstone	5.98333	-58.55
AMNH 471984	cajaneus		Guyana		Rupununi	3	-59.5
AMNH 436521	cajaneus		Guyana
BMNH 1904.10.30.3	cajaneus		Guyana
AMNH 798724	cajaneus		nd	nd	nd
AMNH 798725	cajaneus		nd	nd	nd
AMNH 798726	cajaneus		nd	nd	nd
AMNH 406825	cajaneus		nd		nd
AMNH 471959	cajaneus	M	Panama	Chiriqui	Boqueti	8.78	-82.43
MZUSP 6213	cajaneus		Panama	ND	Veragua
MCZ 137086	cajaneus		Panama		Almirante	9.3	-82.4
FMNH 426186	cajaneus	m	Panama		Almirante Bay, Western River, Bocas del Toro	9.3	-82.4
FMNH 426187	cajaneus	f	Panama		Almirante Bay, Western River, Bocas del Toro	9.3	-82.4
BMNH 1969.52.343	cajaneus	F	Panama		Bocas del Toro	9.33333	-82.25
USNM 562536	cajaneus	f	Panama		Bocas del Toro, Chiriqui Lagoon, Bastimentos I., Alvarez Creek	9.32	-82.13
USNM 525934	cajaneus	f	Panama		C.Z., 2mi east Albrook AFB	8.96667	-79.55
MCZ 140468	cajaneus	f	Panama		Cana, east Panama	7.73333	-77.6667
AMNH 471997	cajaneus	m	Panama		Cebaco I., Veragua	7.55	-81.0167
AMNH 471998	cajaneus	m	Panama		Cebaco I., Veragua	7.55	-81.0167
AMNH 472000	cajaneus	m	Panama		Ceiba I.	9.23333	-79.9333
MCZ 137083	cajaneus		Panama		Changuinola Canal	9.41667	-82.4833
MCZ 137078	cajaneus		Panama		Changuinola River	9.41667	-82.4833
MCZ 137079	cajaneus		Panama		Changuinola River	9.41667	-82.4833
MCZ 137080	cajaneus		Panama		Changuinola River	9.41667	-82.4833
MCZ 137082	cajaneus		Panama		Changuinola River	9.41667	-82.4833
MCZ 234217	cajaneus		Panama		Chiriqui Creek
MCZ 234218	cajaneus		Panama		Chiriqui Creek
MCZ 234219	cajaneus		Panama		Chiriqui Creek
AMNH 77381	cajaneus	f	Panama		Chiriqui, Boqueron	8.5	-82.57
AMNH 77382	cajaneus	m	Panama		Chiriqui, Boqueron	8.5	-82.57
AMNH 248087	cajaneus	m	Panama		Cocoplum, Bocas del Toro	9.03	-81.72
AMNH 248088	cajaneus	f	Panama		Cocoplum, Bocas del Toro	9.03	-81.72
AMNH 248089	cajaneus	f	Panama		Cocoplum, Bocas del Toro	9.03	-81.72
AMNH 248090	cajaneus	f	Panama		Cocoplum, Bocas del Toro	9.03	-81.72
MCZ 137088	cajaneus		Panama		Cricamola	8.98	-81.92
FMNH 408829	cajaneus	f	Panama		Darien, Obaldia	8.67	-77.42
FMNH 408827	cajaneus	m	Panama		Darien, Port Obaldia	8.67	-77.42
FMNH 408830	cajaneus	m	Panama		Darien, Port Obaldia	8.67	-77.42
FMNH 408831	cajaneus	m	Panama		Darien, Port Obaldia	8.67	-77.42
FMNH 408828	cajaneus	m	Panama		Darien, Porto Obaldia	8.67	-77.42
MCZ 107649	cajaneus		Panama		Divala	8.41667	-82.7333
MCZ 107650	cajaneus		Panama		Divala	8.41667	-82.7333
AMNH 134623	cajaneus	m	Panama		El Real, Rio Tuyra	8.345	-78.066
AMNH 134624	cajaneus	f	Panama		El Real, Rio Tuyra	8.345	-78.066
AMNH 134625	cajaneus	f	Panama		El Real, Rio Tuyra	8.345	-78.066
MCZ 137087	cajaneus		Panama		Fruitdale	9.3	-82.4167
AMNH 130953	cajaneus	f	Panama		Gatun	9.27	-79.92
AMNH 472001	cajaneus	f	Panama		Gobernador I.	7.55	-81.2
MCZ 137089	cajaneus		Panama		Guabo	8.32	-81.83
AMNH 471996	cajaneus	m	Panama		Iguaros I., Veragua	8.3	-82.4
AMNH 442452	cajaneus	f	Panama		Isla San Jose, Islas Perlas	8.25	-79.1167
AMNH 186637	cajaneus	m	Panama		La Marea, 20 miles south of Santiago, Veraguas	7.8	-80.95
AMNH 186638	cajaneus	m	Panama		La Marea, 20 miles south of Santiago, Veraguas	7.8	-80.95
BMNH 89.11.20.49	cajaneus	F	Panama		Lion Hills Stations, Isthmus of Panama	9.23333	-79.9167
MCZ 107060	cajaneus		Panama		Loma del Leon	9.23	-79.92
AMNH 52634	cajaneus	m	Panama		Nata Coclé	8.33	-80.52
FMNH 407252	cajaneus	f	Panama		Obaldia	8.67	-77.42
FMNH 407451	cajaneus	f	Panama		Obaldia	8.67	-77.42
FMNH 418368	cajaneus	m	Panama		Obaldia	8.67	-77.42
AMNH 472002	cajaneus	f	Panama		Parida I.	8.1	-82.3
AMNH 472003	cajaneus	m	Panama		Parida I.	8.1	-82.3
MCZ 114297	cajaneus	f	Panama		Pearl Islands, Bay of Panama, San Miguel	8.33333	-78.9	holotype of A. c. latens
MCZ 114298	cajaneus	f	Panama		Pearl Islands, Bay of Panama, San Miguel	8.33333	-78.9
MCZ 114299	cajaneus	m	Panama		Pearl Islands, Bay of Panama, San Miguel	8.33333	-78.9
MCZ 403343	cajaneus	m	Panama		Pearl Islands, Bay of Panama, San Miguel	8.33333	-78.9
AMNH 233304	cajaneus	m	Panama		Pearl Islands, El Rey	8.33333	-78.9
AMNH 233305	cajaneus	m	Panama		Pearl Islands, El Rey	8.33333	-78.9
AMNH 233303	cajaneus	m	Panama		Pearl Islands, Pedro Gonzalez, Panama Bay	8.38333	-79.0833
AMNH 233301	cajaneus	f	Panama		Pearl Islands, San Jose	8.25	-79.1167
AMNH 233302	cajaneus	m	Panama		Pearl Islands, San Jose	8.25	-79.1167
USNM 376060	cajaneus	f	Panama		Pedro Gonzales Id.	8.38333	-79.0833
FMNH 407253	cajaneus	f	Panama		Perme	8.75	-77.57
FMNH 407452	cajaneus	m	Panama		Perme	8.75	-77.57
FMNH 407453	cajaneus	m	Panama		Perme	8.75	-77.57
MCZ 155080	cajaneus		Panama		Perme	8.75	-77.57
MCZ 155081	cajaneus		Panama		Perme	8.75	-77.57
MCZ 87429	cajaneus	f	Panama		Rio Jesusito	8.58	-78.5
USNM 376049	cajaneus	f	Panama		San Jose Id.	8.25	-79.1167
USNM 376056	cajaneus	f	Panama		San Jose Id.	8.25	-79.1167
USNM 376059	cajaneus	m	Panama		San Jose Id.	8.25	-79.1167	holotype of A. c. morrissoni
USNM 376050	cajaneus	f	Panama		San José Id.	8.25	-79.1167
USNM 376051	cajaneus	m	Panama		San José Id.	8.25	-79.1167
USNM 376052	cajaneus	m	Panama		San José Id.	8.25	-79.1167
USNM 376053	cajaneus	f	Panama		San José Id.	8.25	-79.1167
USNM 376054	cajaneus	m	Panama		San José Id.	8.25	-79.1167
USNM 376055	cajaneus	f	Panama		San José Id.	8.25	-79.1167
USNM 376058	cajaneus	m	Panama		San José Id.	8.25	-79.1167
USNM 376061	cajaneus	f?	Panama		San José Id.	8.25	-79.1167	nestling
AMNH 408838	cajaneus	m	Panama		San Jose, Pearl Islands	8.25	-79.1167
AMNH 408839	cajaneus	m	Panama		San Jose, Pearl Islands	8.25	-79.1167
AMNH 471999	cajaneus	m	Panama		Sevilla I., Veragua	8.23333	-82.35
MCZ 137084	cajaneus		Panama		Western River	9.25	-82.42
MCZ 137085	cajaneus		Panama		Western River	9.25	-82.42
MNHN 1929.85	cajaneus	M	Panama		Western River	9.25	-82.42
MNHN 1929.86	cajaneus	M	Panama		Western River	9.25	-82.42
AMNH 182611	cajaneus	m	Panama		Wilcox Camp, Veraguas, San Lorenzo River	8.3	-82.1
AMNH 45650	cajaneus		Panama
MNHN 2003.1255	cajaneus		Panama
FMNH 122784	cajaneus		Paraguay		Colonia Nueva Italia	-25.6167	-57.5
FMNH 410924	cajaneus	m	Paraguay		Horqueta	-23.4	-56.8833
FMNH 410925	cajaneus	f	Paraguay		Horqueta	-23.4	-56.8833
FMNH 411512	cajaneus	m	Paraguay		Horqueta	-23.4	-56.8833
FMNH 404812	cajaneus	f	Paraguay		Itape	-25.85	-56.6333
AMNH 471989	cajaneus	f	Paraguay		Rio Apa	-22.1	-58.0333
AMNH 748668	cajaneus	f im?	Paraguay		Rio Pilcomayo (15 miles west from Rio Paraguay)	-25.1667	-57.7833
FMNH 404811	cajaneus	m	Paraguay		Santa Barbara	-25.5	-56.2333
FMNH 401888	cajaneus	f	Paraguay		Villa Rica	-25.75	-56.4333
FMNH 401889	cajaneus	m	Paraguay		Villa Rica	-25.75	-56.4333
FMNH 402653	cajaneus	m	Paraguay		Villa Rica	-25.75	-56.4333
FMNH 402654	cajaneus	m	Paraguay		Villa Rica	-25.75	-56.4333
FMNH 409602	cajaneus	m	Paraguay		Villa Rica	-25.75	-56.4333
AMNH 820696	cajaneus	M	Peru	Ayacucho	Rio Santa Rosa, Sta. Rosa	-12.6667	-47.8667
AMNH 471974	cajaneus	m	Peru	Huánaco	Chuchurras	-10.1	-75.15
FMNH 424915	cajaneus	f	Peru	Loreto	40mi east of Iquitos near R. Napo	-3.73333	-73.8333
FMNH 416037	cajaneus	f	Peru	Loreto	Rio Ucayali, Yarinacocha	-8.25	-74.7167
FMNH 417197	cajaneus	f	Peru	Loreto	Rio Ucayali, Yarinacocha	-8.25	-74.7167
FMNH 425528	cajaneus	f	Peru	Pasco	Cacazú	-10.6333	-75.1167
AMNH 239641	cajaneus	m	Peru		Boca R. Urubamba	-10.7	-73.75
MCZ 47365	cajaneus		Peru		Cuide, Rio Urubamba
FMNH 208145	cajaneus	m	Peru		Cuzco, Marcapata, Hda. Cadena	-13.4	-70.7167
FMNH 208146	cajaneus	m	Peru		Cuzco, Marcapata, Hda. Cadena	-13.4	-70.7167
BMNH 89.11.30.59	cajaneus	F	Peru		Iquitos, U. Amazon	-3.76667	-73.25
AMNH 238805	cajaneus	m	Peru		Lagarto Alto Ucayali	-10.6667	-73.9
AMNH 238806	cajaneus	m	Peru		Lagarto Alto Ucayali	-10.6667	-73.9
AMNH 238807	cajaneus	f	Peru		Lagarto Alto Ucayali	-10.6667	-73.9
AMNH 238808	cajaneus	f	Peru		Lagarto Alto Ucayali	-10.6667	-73.9
FMNH 419739	cajaneus	m	Peru		Madre de Dios, Boca de rio Inambari	-12.6833	-69.7333
FMNH 44019	cajaneus	f	Peru		Moyabamba	-6.05	-76.9667	holotype of A. c. peruana
AMNH 230585	cajaneus	m	Peru		Orosa, R.Amazonas	-3.43333	-72.1333
AMNH 471976	cajaneus		Peru		Pirana
AMNH 230582	cajaneus	m	Peru		Pto. Indiana R. Amazonas	-3.5	-73.3333
AMNH 230583	cajaneus	m	Peru		Pto. Indiana R. Amazonas	-3.5	-73.3333
AMNH 230584	cajaneus	f	Peru		Pto. Indiana R. Amazonas	-3.5	-73.3333
AMNH 237512	cajaneus	f	Peru		Sarayacu R. Ucayali	-6.73333	-75.1
AMNH 237513	cajaneus	f	Peru		Sarayacu R. Ucayali	-6.73333	-75.1
AMNH 237514	cajaneus	f	Peru		Sarayacu R. Ucayali	-6.73333	-75.1
AMNH 237515	cajaneus	f	Peru		Sarayacu R. Ucayali	-6.73333	-75.1
AMNH 237516	cajaneus	m	Peru		Sarayacu R. Ucayali	-6.73333	-75.1
AMNH 237517	cajaneus	m	Peru		Sarayacu R. Ucayali	-6.73333	-75.1
AMNH 237520	cajaneus		Peru		Sarayacu R. Ucayali	-6.73333	-75.1
AMNH 237519	cajaneus	m	Peru		Sarayacu, R. Ucayali	-6.73333	-75.1
AMNH 239697	cajaneus	f	Peru		Sta. Rosa Alto Ucayali	-8.55	-74.3667
AMNH 254909	cajaneus		Peru		Voca Rio Curaray	-2.36667	-74.0833
AMNH 254911	cajaneus	m	Peru		Voca Rio Curaray	-2.36667	-74.0833
AMNH 254914 (quase ilegível)	cajaneus	m	Peru		Voca Rio Curaray	-2.36667	-74.0833
AMNH 254916	cajaneus	m	Peru		Voca Rio Curaray	-2.36667	-74.0833
BMNH 1843.5.24.134	cajaneus		Peru?		"Lima" ?			holotype of A. gutturalis
FMNH 422925	cajaneus	f	Suriname		Kaiserberg Airstrip, Zuid River	3.11667	-56.45
AMNH 471980	cajaneus	m	Suriname		Kwata	5.85	-55.3
AMNH 471977	cajaneus	m	Suriname		Paramaribo	5.83333	-55.1667
AMNH 471978	cajaneus	m	Suriname		Paramaribo	5.83333	-55.1667
AMNH 471979	cajaneus	m	Suriname		Paramaribo	5.83333	-55.1667
ZMB 1997/242	cajaneus		Suriname		Paramaribo	5.83333	-55.1667
FMNH 47318	cajaneus	m	Suriname		Paramaribo, vicinity	5.83333	-55.1667
FMNH 47319	cajaneus	f	Suriname		Paramaribo, vicinity	5.83333	-55.1667
MCZ 109942	cajaneus		Suriname		Vic. Of Paramaribo	5.83333	-55.1667
MCZ 109943	cajaneus		Suriname		Vic. Of Paramaribo	5.83333	-55.1667
MCZ 143216	cajaneus		Suriname		Vic. Of Paramaribo	5.83333	-55.1667
MCZ 143217	cajaneus		Suriname		Vic. Of Paramaribo	5.83333	-55.1667
MCZ 143218	cajaneus		Suriname		Vic. Of Paramaribo	5.83333	-55.1667
MCZ 143219	cajaneus		Suriname		Vic. Of Paramaribo	5.83333	-55.1667
MCZ 143390	cajaneus		Suriname		Vic. Of Paramaribo	5.83333	-55.1667
MCZ 143391	cajaneus		Suriname		Vic. Of Paramaribo	5.83333	-55.1667
MCZ 143393	cajaneus	m	Suriname		Vic. Of Paramaribo	5.83333	-55.1667
MCZ 280176	cajaneus	f	Suriname		Vic. Of Paramaribo	5.83333	-55.1667
MCZ 75645	cajaneus		Suriname		Vic. Of Paramaribo	5.83333	-55.1667
MCZ 81553	cajaneus	m	Suriname		Vic. Of Paramaribo	5.83333	-55.1667
MCZ 83287	cajaneus	f	Suriname		Vic. Of Paramaribo	5.83333	-55.1667
AMNH 313373	cajaneus		Suriname		Vic. Paramaribo	5.83333	-55.1667
AMNH 471981	cajaneus	f	Suriname		Wanica	5.78333	-54.2333
AMNH 471982	cajaneus		Suriname
AMNH 60661	cajaneus	f	Trinidad and Tobago		Caparo, Trinidad	10.45	-61.33
AMNH 60662	cajaneus	f	Trinidad and Tobago		Caparo, Trinidad	10.45	-61.33
AMNH 471961	cajaneus	m	Trinidad and Tobago		Caroni Swamp, Trinidad	10.6	-61.38
AMNH 59514	cajaneus		Trinidad and Tobago		Princestown, Trinidad	10.27	-61.38
AMNH 59515	cajaneus	F	Trinidad and Tobago		Princestown, Trinidad	10.27	-61.38
AMNH 59516	cajaneus		Trinidad and Tobago		Princestown, Trinidad	10.27	-61.38
AMNH 59517	cajaneus	f	Trinidad and Tobago		Princestown, Trinidad	10.27	-61.38
AMNH 471962	cajaneus	f	Trinidad and Tobago		Savannah Grande	10.05	-61.6
FMNH 75249	cajaneus	m im	Uruguay		Minas, Polanco	-33.9	-55.15
COP 55939	cajaneus		Venezuela	Amazonas	Alto Caño Quiruba, afluente Rio Aulana	4.73	-67.683
COP 20619	cajaneus	f	Venezuela	Amazonas	Caño Cataniapo, Atures	5.6	-67.583
COP 20620	cajaneus	f	Venezuela	Amazonas	Caño Cataniapo, Atures	5.6	-67.583
COP 37963	cajaneus	m	Venezuela	Amazonas	Caño Parusito, El Platanal	5.7167	-65.8833
COP 34800	cajaneus		Venezuela	Amazonas	Nacientes Ríos Siapa y Padauiri, Poste 4	1.333	-64.5667
COP 38209	cajaneus	f	Venezuela	Amazonas	Rio Ventuari, Las Carmelitas	4.1167	-66.6
COP 14753	cajaneus	m	Venezuela	Anzoategui	Barcelona	10.13	-64.6333
COP 47695	cajaneus	m	Venezuela	Apure	Caño Apure Seco, Birhuaca	7.9	-67.5
COP 36616	cajaneus	f	Venezuela	Apure	El Amparo	7.1	-70.75
COP 2153	cajaneus	f	Venezuela	Apure	Guasdualito	7.25	-70.733
COP 36615	cajaneus	f	Venezuela	Apure	Guasdualito	7.25	-70.733
COP 36617	cajaneus	m	Venezuela	Apure	Guasdualito	7.25	-70.733
COP 24755	cajaneus	m	Venezuela	Aragua	Lago de Valencia	10.25	-67.6667
CMNH 36208	cajaneus	m	Venezuela	Bolivar	El Hacha	10.5167	-68.8667
CMNH 36216	cajaneus	m	Venezuela	Bolivar	El Hacha	10.5167	-68.8667
CMNH 36288	cajaneus	f	Venezuela	Bolivar	El Hacha	10.5167	-68.8667
COP 67825	cajaneus	m	Venezuela	Bolivar	El Venamo	6.7167	-61.2167
COP 24989	cajaneus	m	Venezuela	Bolívar	El Cambur, Bajo Caura	7.4	-65.1667
COP 69918	cajaneus	f	Venezuela	Bolívar	Falda Norte, Cerro Primavera	7.4	-65.5833
COP 76973	cajaneus	m	Venezuela	Bolívar	Hato El Encanto, 15km SE Upata	7.75	-62.5833
COP 15829	cajaneus	m	Venezuela	Bolívar	La Paragua	6.8333	-63.3333
COP 74270	cajaneus	f	Venezuela	Bolívar	Perú, El Callao	7.3167	-61.8333
COP 74561	cajaneus	m	Venezuela	Delta Amacuro	Caño Merejina	8.8833	-60.8333
COP 67344	cajaneus	f	Venezuela	Delta Amacuro	Capure	9.9833	-62.2167
COP 49526	cajaneus	f	Venezuela	Delta Amacuro	Jobure; Rio Jobure	8.8333	-60.7667
COP 47974	cajaneus	f	Venezuela	Delta Amacuro	Misíon Araguaimujo	8.75	-61.55
COP 47976	cajaneus	f	Venezuela	Delta Amacuro	Mision del Guayo	9.0333	-60.9
COP 47975	cajaneus	m	Venezuela	Delta Amacuro	Mision Sn. Fco. De Guayo	9.0333	-60.9
CMNH 103788	cajaneus	m	Venezuela	Distrito Federal	Puerto La Cruz	10.5333	-67.35
COP 63581	cajaneus	m	Venezuela	Falcón	Mirimire	11.15	-68.7167
COP 81702	cajaneus	f	Venezuela	Falcón	PN Morrocoy, Carretera via La Luisa	10.7833	-68.3167
COP 2154	cajaneus	m	Venezuela	Guárico	Camaguán	8.1	-67.6
COP 2155	cajaneus	f	Venezuela	Guárico	Camaguán	8.1	-67.6
COP 2156	cajaneus	m	Venezuela	Guárico	Camaguán	8.1	-67.6
COP 39832	cajaneus		Venezuela	Guárico	Santa Maria de Ypire	8.8167	-65.3167
COP 71985	cajaneus	f	Venezuela	Lara	40km al sur Cabudare	9.8833	-69.26
COP 5181	cajaneus	m	Venezuela	Lara	Cubiro	9.76667	-69.5667
COP 8389	cajaneus	m	Venezuela	Miranda	Carenero	10.533	-66.1167
COP 75805	cajaneus	f	Venezuela	Sucre	Cariaquito, Macuro	10.6667	-61.9
COP 40622	cajaneus		Venezuela	Sucre	Macuro, Pto. Cristobal Colon	10.65	-61.933
COP 60528	cajaneus	m	Venezuela	Táchira	Burgua, El Teteo	7.4167	-72.0167
COP 28355	cajaneus	f	Venezuela	Táchira	La Fria	8.2167	-72.25
COP 28356	cajaneus	f	Venezuela	Táchira	La Fria	8.2167	-72.25
COP 28357	cajaneus	m	Venezuela	Táchira	La Fria	8.2167	-72.25
AMNH 436519	cajaneus	f	Venezuela		Agua Salada de Cd. Bolivar	8.13333	-63.55
AMNH 471965	cajaneus		Venezuela		Caura
CMNH 106799	cajaneus	f	Venezuela		Cumanacoa	10.25	-63.9167
CMNH 106800	cajaneus	f	Venezuela		Cumanacoa	10.25	-63.9167
CMNH 106812	cajaneus	f im	Venezuela		Cumanacoa	10.25	-63.9167
CMNH 36188	cajaneus	f	Venezuela		El Hacha	10.5167	-68.8667
AMNH 75413	cajaneus	f	Venezuela		El Llaqual	7.41667	-65.1667
FMNH 34472	cajaneus	m	Venezuela		Encontradas, Zulia	9.05	-72.2333	holotype of A. c. venezuelensis
AMNH 525542	cajaneus	m	Venezuela		Guanoco	10.1333	-62.9333
BMNH 1963.12.12.5	cajaneus	F	Venezuela		Guanoco	10.1333	-62.9333
AMNH 471967	cajaneus	m	Venezuela		inland of Pto. Cabello, San Esteban	10.4333	-68.0167
AMNH 272242	cajaneus	M	Venezuela		La Laja, Rio Orinoco, Mt. Duida	3.16667	-65.5833
AMNH 269627	cajaneus	f	Venezuela		Las Barrancas, riv. Orinoco	8.7	-62.1833
AMNH 436520	cajaneus	f im	Venezuela		Las Barrancas, riv. Orinoco	8.7	-62.1833
BMNH 89.11.26.91	cajaneus	M	Venezuela		Limones	9.14	-71.97
BMNH 1914.11.26.92	cajaneus	M	Venezuela		Montañas de Limones, Mérida	9.14	-71.97
AMNH 323243	cajaneus	f	Venezuela		Mt. Auyan Tepui	5.91667	-62.5333
AMNH 272243	cajaneus		Venezuela		Mt. Duida, middle camp	3.41667	-65.6667
AMNH 471964	cajaneus	f	Venezuela		Quiribana de Caicara	7.61667	-66.1667
AMNH 471963	cajaneus	m	Venezuela		Quiribana de Caicara, Orinoco	7.61667	-66.1667
BMNH 1965.36.7	cajaneus	F	Venezuela		Rio Aguaro, Guarico	8.28333	-66.7
FMNH 400022	cajaneus	f	Venezuela		Rio Guachi	8.85	-71.45
FMNH 400023	cajaneus	f	Venezuela		Rio Guachi	8.85	-71.45
AMNH 471966	cajaneus		Venezuela		San Pedro, Caura valley	7.38333	-65.0167
MCZ 54138	cajaneus		Venezuela		Upper Caura R.
AMNH 120337	cajaneus	f	Venezuela		Upper Orinoco
FMNH 43225	cajaneus	m	Venezuela		Zulia, Empelado Savannah, 30mi east Maracaibo	10.6667	-71.5
MNHN 2009.131	cajaneus				"Amérique du Sud"
MNHN 2009.147	cajaneus				"Amérique du Sud"
AMNH 471988	cajaneus	f			Cayenne, Venezuela
MPEG 40724	cajaneus				Parque Zoobotânico Museu Goeldi (captivity)			nestling
AMNH 471990	cajaneus	f			Rio de la Plata	-34.2	-58.4
BMNH 42.9.7.75	cajaneus				S. America
AMNH 471975	cajaneus	m			Samirea
AMNH 237518	cajaneus	m			Sarayacu R. Ucayali	-6.73333	-75.1
AMNH 45654	cajaneus				Upper Amazon
BMNH 89.211.20.48	cajaneus				Verágua
AMNH 233340	cajaneus
AMNH 237914	cajaneus
AMNH 471883	cajaneus
AMNH 471977	cajaneus
AMNH 798728	cajaneus
FMNH 418903	cajaneus
FMNH 422570	cajaneus
FMNH 426185	cajaneus	f
MNHN 1894.833	cajaneus
MZUSP 14072	mangle	f	Brazil	Bahia	Curupeba, prox. Ilha M. de Deus	-12.7167	-38.6
MZUSP 10150	mangle	f	Brazil	Bahia	Ilhéus	-14.8167	-39.0333
MZUSP 10151	mangle	f	Brazil	Bahia	Ilhéus	-14.8167	-39.0333
MZUSP 10152	mangle	f	Brazil	Bahia	Ilhéus	-14.8167	-39.0333
USNM 52877	mangle		Brazil	Bahia	nd
MZUSP 7600	mangle	m	Brazil	Bahia	Vila Nova	-10.45	-40.1833
BMNH 89.11.20.74	mangle		Brazil	Bahia
BMNH 89.11.20.75	mangle		Brazil	Bahia
ZMB 1997/245	mangle		Brazil	Bahia
MZUSP 32924	mangle	M	Brazil	Ceará	Município Pacoti, Serra do Baturité	-4.21667	-38.9333
MBML 7110	mangle		Brazil	Espírito Santo	APA Conceição da Barra	-18.5833	-39.75
MZUSP 6654	mangle	m	Brazil	Maranhão	Primeira Cruz	-2.5	-43.4333
MZUSP 6655	mangle	m	Brazil	Maranhão	Primeira Cruz	-2.5	-43.4333
MPEG 67808	mangle		Brazil	Maranhão	São João dos Patos, Povoado Jatobá dos Noletos, Serra da Raposa	-6.6	-43.6
MCZ 22982	mangle		Brazil	Pará	Anjos	-0.483333	-48.6
MPEG 33383	mangle	F	Brazil	Pará	Marapanim, Vista Alegre, praia do Rio Camará	-0.7	-47.7167
MPEG 33384	mangle	F	Brazil	Pará	Marapanim, Vista Alegre, praia do Rio Camará	-0.7	-47.7167
MPEG 33924	mangle	M	Brazil	Pará	Marapanim, Vista Alegre, praia do Rio Camará	-0.7	-47.7167
MPEG 33925	mangle	M	Brazil	Pará	Marapanim, Vista Alegre, praia do Rio Camará	-0.7	-47.7167
MPEG 33926	mangle	F	Brazil	Pará	Marapanim, Vista Alegre, praia do Rio Camará	-0.7	-47.7167
MPEG 33927	mangle	F	Brazil	Pará	Marapanim, Vista Alegre, praia do Rio Camará	-0.7	-47.7167
MPEG 33928	mangle	M	Brazil	Pará	Marapanim, Vista Alegre, praia do Rio Camará	-0.7	-47.7167
MPEG 33929	mangle	M	Brazil	Pará	Marapanim, Vista Alegre, praia do Rio Camará	-0.7	-47.7167
MNHN 1971.786	mangle		Brazil	Pernambuco	Exu	-7.51667	-39.7167
MNHN 1971.787	mangle		Brazil	Pernambuco	Exu	-7.51667	-39.7167
FMNH 403199	mangle	m	Brazil	Piauí	Arara	-4.83333	-40.9167
MNRJ 46057	mangle	M	Brazil	Rio de Janeiro	Hotel Granja, Agulhas Negras	-22.4333	-44.6
MNRJ 33447	mangle	F	Brazil	Rio de Janeiro	Itaoca, distr de São Gonçalo, Niterói	-22.7667	-43.05
MZUSP 67209	mangle	F	Brazil	São Paulo	Costão dos Engenhos	-24.6667	-47.45
MZUSP 67210	mangle	F	Brazil	São Paulo	Costão dos Engenhos	-24.6667	-47.45
MZUSP 61737	mangle	M	Brazil	São Paulo	Icapara	-24.6833
MZUSP 61738	mangle	F	Brazil	São Paulo	Icapara	-24.6833	-47.4167
MZUSP 67211	mangle	F	Brazil	São Paulo	Iguape	-24.7167	-47.55
MZUSP 67208	mangle		Brazil	São Paulo	near iguape	-24.7167	-47.55
MZUSP 79462	mangle		Brazil	São Paulo	Santos	-23.95	-46.3333
MNRJ 15872	mangle	F	Brazil
AMNH 471950	mangle				Bahia
BMNH no register	mangle				S. America
ZMB 1997/246	mangle	F			Zoo Berlin (captivity)
AMNH 471951	mangle	f
FMNH 422343	wolfi	m	Colombia		Chocó, Rio Baudo, Rio Saudo	5.05	-76.95
AMNH 170821	wolfi	m	Ecuador	El Oro	La Chonta	-3.58333	-79.8833
FMNH 51118	wolfi	m	Ecuador	Esmeraldas	Corondeled	1.1	-78.7
FMNH 409184	wolfi	m	Ecuador	Esmeraldas	Rio Blanco	-0.466667	-79.4167
AMNH 123883	wolfi	m	Ecuador	Guayas	Naranjo	-2.21667	-79.4833
BMNH 89.11.20.67	wolfi		Ecuador		Balzar Mountains	-0.916667	-79.9167
BMNH 89.11.20.68	wolfi		Ecuador		Balzar Mountains	-0.916667	-79.9167
MCZ 94631	wolfi	F	Ecuador		Borbon, n. Ecuador	1.1	-78.9833
USNM 263646	wolfi	f	Ecuador		Carondalet, NW Ecuador	1.1	-78.7
AMNH 472006	wolfi	m	Ecuador		Carondelet	1.1	-78.7
AMNH 472007	wolfi	f	Ecuador		Carondelet	1.1	-78.7
AMNH 181050	wolfi	f	Ecuador		Cerro Manglar Alto	-2	-80.3333
MIZ 34105	wolfi		Ecuador		Chimbo	-2.16667	-79.1667	holotype of A. wolfi
MNHN sem número	wolfi		Ecuador		Ecuador ocidental
FMNH 416330	wolfi	m	Ecuador		Manabi, Mongoya	-0.167	-79.633
BMNH 1916.8.24.16	wolfi	F	Ecuador		Mindo, west	-0.0333333	-78.8
BMNH 1916.8.24.17	wolfi		Ecuador		Mindo, west	-0.0333333	-78.8
BMNH 1916.8.24.18	wolfi	nd nestling	Ecuador		Mindo, west	-0.0333333	-78.8
AMNH 172939	wolfi	f	Ecuador		Near Mindo, W. side Pichincha	-0.0333333	-78.8
AMNH 472004	wolfi	m	Ecuador		Pambilar, n. Ecuador	0.66	-79.2
AMNH 472005	wolfi	m	Ecuador		Pambilar, n. Ecuador	0.66	-79.2
FMNH 371218	wolfi	m	Ecuador		Prov. Los Rios, Rio Palenque Field Station	-0.5	-79.5
FMNH 401606	wolfi	f	Ecuador		Puente de Chimbo	-2.16667	-79.1667
AMNH 172937	wolfi	f	Ecuador		Rio Blanco, below Mindo	-0.0333333	-78.8
AMNH 119581	wolfi	f	Ecuador		Rio de Oro, Manavi	-0.466667	-79.6
FMNH 400206	wolfi	m	Ecuador		Sto. Domingo	-0.25	-79.15
BMNH 89.11.20.66	ypecaha	M	Argentina	Buenos Aires	Conchitas	-34.7833	-58.1667
MZUSP 3885	ypecaha	F	Argentina	Buenos Aires	Ensenada	-34.85	-57.9167
AMNH 792486	ypecaha	m	Argentina	Corrientes	Concepcion, Ea. Rincon de Luna	-28.4667	-58.2333
AMNH 792487	ypecaha	f	Argentina	Corrientes	Concepcion, Ea. Rincon de Luna	-28.4667	-58.2333
AMNH 792485	ypecaha	m	Argentina	Corrientes	Mercedes, Ea. Rincon del Ombú	-27.4333	-56.25
AMNH 792488	ypecaha	f	Argentina	Corrientes	San Luis del Palmar, Ea. Garabatá	-27.6667	-58.4333
AMNH 792489	ypecaha	f	Argentina	Corrientes	Torrent, Monte del Cuay Chico	-28.7167	-56.4167
CMNH 140635	ypecaha	f	Argentina	Entre Rios	Gualequay (Ea. La Calera)	-33.4	-58.6167
USNM 614590	ypecaha	m	Argentina	Entre Rios	nr Pt. Constanza, Estancia El Tala	-33.8333	-59.05
AMNH 201547	ypecaha		Argentina	Entre Rios	Santa Elena	-30.95	-59.8
AMNH 778904	ypecaha	f	Argentina	Entre Rios	Sta. Elena, Ea. Vizcacheras	-31.1333	-59.7667
AMNH 472008	ypecaha	m	Argentina	Santa Fé	Mocovi	-28.4	-59.7
AMNH 472009	ypecaha	juv	Argentina		Barracas al Sud	-34.65	-58.3667
AMNH 472010	ypecaha	f	Argentina		Barracas al Sud	-34.65	-58.3667
AMNH 525541	ypecaha	f	Argentina		Barracas al Sud	-28.4	-59.7
AMNH 472011	ypecaha	m	Argentina		La Soledad	-32.5	-58.6833
AMNH 241190	ypecaha	m	Brazil	Bahia	Santa Ritta	-11	-44.5333
AMNH 241191	ypecaha	m	Brazil	Bahia	Santa Ritta	-11	-44.5333
AMNH 241192	ypecaha	m	Brazil	Bahia	Santa Ritta	-11	-44.5333
AMNH 241193	ypecaha	f	Brazil	Bahia	Santa Ritta	-11	-44.5333
MZUSP 40776	ypecaha	M	Brazil	Bahia	Sta. Rita de Cássia, Rio Preto	-11	-44.5333
MZUSP 34968	ypecaha	M	Brazil	Mato Grosso	Molha Saco, 65 Km de Pindaíba, São Domingos	-13.5	-51.3833
MZUSP 82664	ypecaha		Brazil	Mato Grosso	Pousada Kuryala, São Felix do Araguaia	-11.7	-50.7
MNRJ 25044	ypecaha	F	Brazil	Minas Gerais	Pirapora	-17.35	-44.9333
MZUSP 15777	ypecaha	M	Brazil	Minas Gerais	Rio Bandeiro	-15.7	-44.6
MZUSP 81981	ypecaha	M	Brazil	Pará	Faz. Fartura, Santana do Araguaia	-9.73333	-50.3
MZUSP 81982	ypecaha		Brazil	Pará	Faz. Fartura, Santana do Araguaia	-9.73333	-50.3
MZUSP 81983	ypecaha	F	Brazil	Pará	Faz. Fartura, Santana do Araguaia	-9.73333	-50.3
MZUSP 83742	ypecaha	M	Brazil	Pará	Faz. Fartura, Santana do Araguaia	-9.9	-50.2667
MZUSP 83743	ypecaha	F	Brazil	Pará	Faz. Fartura, Santana do Araguaia	-9.7	-50.4
MZUSP 88038	ypecaha		Brazil	Pará	Faz. Fartura, Santana do Araguaia	-9.73333	-50.1833
MZUSP 88039	ypecaha	F	Brazil	Pará	Faz. Fartura, Santana do Araguaia	-9.73333	-50.1833
MZUSP 89863	ypecaha		Brazil	Pará	Faz. Fartura, Santana do Araguaia	-9.73333	-50.4
MPEG 48497	ypecaha	M	Brazil	Pará	Santana do Araguaia, Fazenda Barra das Princesas	-9.66667	-50.1833
MPEG 48498	ypecaha	F	Brazil	Pará	Santana do Araguaia, Fazenda Barra das Princesas	-9.66667	-50.1833
MPEG 48499	ypecaha	M	Brazil	Pará	Santana do Araguaia, Fazenda Barra das Princesas	-9.66667	-50.1833
MNRJ 32880	ypecaha	M	Brazil	Rio Grande do Sul	40km SW of São Borja	-28.95	-56.1833
MZUSP 9110	ypecaha	F	Brazil	Rio Grande do Sul	Itaqui	-29.1333	-56.55
MZUSP 9111	ypecaha	M	Brazil	Rio Grande do Sul	Itaqui	-29.1333	-56.55
AMNH 139909	ypecaha	m	Brazil	Rio Grande do Sul	Itaquy	-29.1333	-56.55
MZUSP 80043	ypecaha	F	Brazil	Tocantins	Faz. São Luís, Sucupira	-11.95	-48.85
MZUSP 80044	ypecaha	F	Brazil	Tocantins	Faz. São Luís, Sucupira	-11.95	-48.85
AMNH 12319	ypecaha		nd	nd	nd
AMNH 472012	ypecaha		nd		nd
ZMB 1997/248	ypecaha	F	Paraguay	Asuncíon	Asuncion	-25.2667	-57.6667
FMNH 122782	ypecaha	m	Paraguay		Colonia Nueva Italia	-25.6167	-57.5
FMNH 122783	ypecaha		Paraguay		Colonia Nueva Italia	-25.6167	-57.5
FMNH 415300	ypecaha	f	Paraguay		Colonia Nueva Italia, near Villeta	-25.6167	-57.5
FMNH 411014	ypecaha	m	Paraguay		Horqueta	-23.4	-56.8833
FMNH 411015	ypecaha	m	Paraguay		Horqueta	-23.4	-56.8833
FMNH 411016	ypecaha	f	Paraguay		Horqueta	-23.4	-56.8833
FMNH 411017	ypecaha	f	Paraguay		Horqueta	-23.4	-56.8833
BMNH 95.9.8.115	ypecaha		Paraguay		Rio Pilcomayo	-24.5	-59.3333
FMNH 401890	ypecaha	m	Paraguay		Villa Rica	-25.75	-56.4333
FMNH 402650	ypecaha	m	Paraguay		Villa Rica	-25.75	-56.4333
FMNH 402651	ypecaha	m	Paraguay		Villa Rica	-25.75	-56.4333
FMNH 402652	ypecaha		Paraguay		Villa Rica	-25.75	-56.4333	nestling
FMNH 402918	ypecaha		Paraguay		Villa Rica	-25.75	-56.4333	nestling
FMNH 404813	ypecaha		Paraguay		Villa Rica	-25.75	-56.4333	immature
BMNH 1928.4.3.3	ypecaha	M	Paraguay		Villarico	-25.75	-56.4333
FMNH 64519	ypecaha	m	Uruguay		San Jose, Arazati	-34.5667	-57
FMNH 402682	ypecaha	m	Uruguay		Soriano	-33.5167	-57.75
AMNH 458913	ypecaha				captivity			nestling
ZMB 30/1501	ypecaha	F			Zoo Berlin (captivity)
BMNH 97.7.3.1	ypecaha	F						nestling
ZMB 1997/247	ypecaha
