# Supplementary material for: A taxonomic review of Aramides cajaneus (Aves, Gruiformes, Rallidae) with notes on morphological variation in other species of the genus
Source: Zookeys. 2015 Apr 27;(500):111–40. doi: 10.3897/zookeys.500.7685 (PMC4432243; doi:10.3897/zookeys.500.7685)
Supplement: Supplementary material 2 — Recordings examined [file zookeys-500-111-s002.xlsx]

## Sheet: Supplementary File 2 - recordin
Collection/Reference/Personal archives of	Number	Identification	Country	State/Province/Department	Locality	Latitude	Longitude
FNJV	9650	cajaneus	Brazil	Distrito Federal	Parque Nacional de Brasília	-15.78	-47.92
FNJV	4029	cajaneus	Brazil	Tocantins
Glaucia del-Rio		cajaneus	Brazil	Rondônia	Jirau. Caiçara. MD Rio Madeira	-9.43	-64.82
Jesse Fagan		albiventris	Belize/Guatemala border		Rio Sarstun	15.89	-88.94
John Moore		albiventris	Belize		Chan Chich	17.57	-89.05
LNS	23151	albiventris	Belize		Just N Of Orangewalk	18.07	-88.55
LNS	2795	albiventris	Mexico	Chiapas	5.0 km SE of Puerto Madero	14.92	-92.37
LNS	2794	albiventris	Mexico	Veracruz	Agua Dulce	18.15	-94.13
LNS	100668	cajaneus	Bolivia	El Beni	N of Rurrenabaque; near Santa Rosa	-14.45	-67.53
LNS	38932	cajaneus	Bolivia	Pando	SW of Cobija; Camino Mucden	-11.08	-68.89
LNS	38954	cajaneus	Bolivia	Pando	SW of Cobija; Camino Mucden	-11.08	-68.89
LNS	82642	cajaneus	Bolivia	Santa Cruz	Curuyuqui	-18.78	-62.24
LNS	128053	cajaneus	Brazil	Alagoas	Coruripe, Usina Coruripe	-10.01	-36.28
LNS	48643	cajaneus	Brazil	Amazonas	60.0 km N of Manaus; Tower ZF-2	-2.61	-60.21
LNS	115281	cajaneus	Brazil	Amazonas	Reserva Florestal Adolfo Ducke	-2.93	-59.98
LNS	127498	cajaneus	Brazil	Amazonas	Rio Taruma, Amazon EcoPark	-3	-60.12
LNS	34123	cajaneus	Brazil	Distrito Federal	SE of Brazilia; IBGE Reserve	-15.93	-47.88
LNS	88994	cajaneus	Brazil	Mato Grosso	Floresta Amazonica Hotel	-9.87	-56.08
LNS	63830	cajaneus	Brazil	Rio Grande do Sul	10.0 km S of Uruguaiana	-29.83	-57.08
LNS	18864	cajaneus	Brazil	Rio Grande do Sul	35.0 km NE of Itaqui; Banhado S. Donato	-28.95	-56.18
LNS	18865	cajaneus	Brazil	Rio Grande do Sul	35.0 km NE of Itaqui; Banhado S. Donato	-28.95	-56.18
LNS	18857	cajaneus	Brazil	Rio Grande do Sul	5.0 km SE of OSORIO; PALMARES DO SUL	-30.25	-50.5
LNS	82128	cajaneus	Colombia	Tolima	La Hacienda above & W or SW of Cunday	4.07	-74.7
LNS	27264	cajaneus	Costa Rica	Puntarenas	26.0 km SW of Osa Peninsula; SSW of Rincon de Osa	8.52	-83.6
LNS	29078	cajaneus	Costa Rica	Puntarenas	Pto. Jimenez	8.57	-83.33
LNS	51765	cajaneus	Costa Rica		Las Cruces Botanical Gardens	8.78	-82.95
LNS	55010	cajaneus	Ecuador	Napo	100.0 km E of Coca; LaSelva Lodge	-0.45	-76.28
LNS	68540	cajaneus	Ecuador		22.0 km E of Lago Agrio on Rio Aguarico (at Amazon Jungle Village Resort)	0	-76.7
LNS	2796	cajaneus	Panama		4.0 km SE of Rio Hato	8.37	-80.17
LNS	2305	cajaneus	Panama		BACK ROAD TO CHORRERA; Canal Zone	8.93	-79.67
LNS	2306	cajaneus	Panama		BACK ROAD TO CHORRERA; Canal Zone	8.93	-79.67
LNS	25607	cajaneus	Panama		Tocumen Marsh	9.08	-79.38
LNS	30081	cajaneus	Peru	Cuzco	1.0 km W of Pilcopata	-13.13	-71.17
LNS	30088	cajaneus	Peru	Cuzco	2.0 km W of Pilcopata	-13.13	-71.17
LNS	140203	cajaneus	Peru	Cuzco	Amazonia Lodge	-12.87	-71.38
LNS	18395	cajaneus	Peru	Loreto	Balta on Rio Curanja	-10.13	-71.22
LNS	31794	cajaneus	Peru	Loreto	north bank Rio Napo; Sucusari Camp	-3.25	-72.92
LNS	29766	cajaneus	Peru	Madre de Dios	Cocha Cashu; Manu National Park	-11.85	-71.32
LNS	29767	cajaneus	Peru	Madre de Dios	Cocha Cashu; Manu National Park	-11.85	-71.32
LNS	29893	cajaneus	Peru	Madre de Dios	Cocha Cashu; Manu National Park	-11.85	-71.32
LNS	29916	cajaneus	Peru	Madre de Dios	Cocha Cashu; Manu National Park	-11.85	-71.32
LNS	37293	cajaneus	Peru	Madre de Dios	Cocha Salvadore	-12.07	-71.17
LNS	37307	cajaneus	Peru	Madre de Dios	Cocha Salvadore	-12.07	-71.17
LNS	134683	cajaneus	Suriname	Sipaliwini	Bakhuis Gebergte	4.35	-56.75
LNS	67976	cajaneus	Venezuela	Amazonas	20.0 km S of San Carlos; Rio Negro; Isla Chicharral	1.63	-66.95
LNS	67977	cajaneus	Venezuela	Apure	15.0 km E of Guasdualito	7.25	-70.73
LNS	67965	cajaneus	Venezuela	Aragua	Cumboto	10.48	-67.77
LNS	53667	cajaneus	Venezuela	Aragua	El Playon	10	-68
LNS	67964	cajaneus	Venezuela	Aragua	Ocumare de la Costa	10.47	-67.77
LNS	67967	cajaneus	Venezuela	Barinas	Hato Corozal; Isla Ruende; Savannah Camp	8.2	-69.93
LNS	67968	cajaneus	Venezuela	Barinas	Hato Corozal; Isla Ruende; Savannah Camp	8.2	-69.93
LNS	67969	cajaneus	Venezuela	Cojedes	Hato El Milagro; Cano Lake	9.58	-68
LNS	67966	cajaneus	Venezuela	Guarico	Hato Flores Moradas	8.42	-67.5
LNS	67975	cajaneus	Venezuela	Zulia	70.0 km W of Orope	8.5	-72.5
LNS	67970	cajaneus	Venezuela	Zulia	Rio Aricuaica; near junction with Rio Lora	9.58	-72.78
LNS	67973	cajaneus	Venezuela		10.0 km E of Paso Caruachi; Rio Caroni	7.33	-64.92
LNS	67974	cajaneus	Venezuela		10.0 km E of Rio Caroni	8.1	-62.8
LNS	67972	cajaneus	Venezuela		Rio Grande; ~2 km north of km 9.5; El Palmar	7.97	-61.88
LNS	67971	cajaneus	Venezuela		Upata; Sta. Maria	8.02	-62.4
Lopez-Lanus 2009		cajaneus	Argentina	Buenos Aires	Reserva Costanera Sul	-34.6	-58.45
Lopez-Lanus 2009		cajaneus	Argentina	Salta	Acambuco	-22.18	-63.95
Luis Sandoval	598	cajaneus	Costa Rica	Limon	Manzanillo	9.63	-82.65
Luis Sandoval	599	cajaneus	Costa Rica		UCR San Jose	9.93	-84.08
Luis Sandoval	600	cajaneus	Costa Rica		UCR San Jose	9.93	-84.08
Luis E. Vargas		cajaneus	Costa Rica		Piro, Osa	8.4	-83.33
Luis E. Vargas		cajaneus	Costa Rica		Rincón de Osa	8.7	-83.48
Luis E. Vargas		cajaneus	Costa Rica		Rincón de Osa	8.7	-83.48
Luis E. Vargas		cajaneus	Costa Rica		San José	9.93	-84.08
Luis E. Vargas		cajaneus	Costa Rica		San José	9.93	-84.08
Luis E. Vargas		cajaneus	Costa Rica		San José	9.93	-84.08
Luis Fabio Silveira		avicenniae	Brazil	São Paulo	mangue de Santos/Cubatão	-23.87	-46.38
Minns et al 2009		cajaneus	Brazil	Goiás	Alto Paraíso de Goiás. Fazenda Chapada das Almas	-14.12	-47.5
Minns et al 2009		cajaneus	Brazil	Maranhão	Carolina	-7.33	-47.47
Minns et al 2009		cajaneus	Brazil	Mato Grosso do Sul	Miranda. Fazenda Caiman	-19.57	-56.18
Minns et al 2009		cajaneus	Brazil	Minas Gerais	P.N. Cavernas do Peruaçu	-15.12	-44.25
Minns et al 2009		cajaneus	Brazil	Minas Gerais	Serra da Canastra	-20.25	-46.62
Minns et al 2009		cajaneus	Brazil	Rio Grande do Sul	Barra do Quaraí	-30.2	-57.55
Minns et al 2009		cajaneus	Brazil	São Paulo	P.E. Serra do Mar - Núcleo Picinguaba	-23.35	-44.83
Minns et al 2009		cajaneus	Brazil	Tocantins	P.E. Cantão. Furo da Barreirinha	-9.5	-50.17
Minns et al 2009		avicenniae	Brazil	Paraná	Baía de Guaratuba	-25.83	-48.63
Rafael S. Marcondes		cajaneus	Brazil	Goiás	Campinaçu	-13.78	-48.57
Rafael S. Marcondes		cajaneus	Brazil	Goiás	Campinaçu	-13.78	-48.57
Rafael S. Marcondes		cajaneus	Brazil	São Paulo	Lençóis Paulista, Fazenda Rio Claro	-22.82	-49.03
Thiago V. V. Costa		cajaneus	Brazil	Rondônia	Jirau. Caiçara. MD Madeira	-9.43	-64.82
Thiago V. V. Costa		cajaneus	Brazil	Rondônia	Jirau. Caiçara. MD Madeira	-9.43	-64.82
MZUSP	1022	cajaneus	Brazil	Minas Gerais	Ijaci	-21.17	-44.92
Vagner Cavarzere		cajaneus	Brazil	Mato Grosso	Barão de Melgaço, Acurizal	-16.6	-56.25
Vagner Cavarzere		cajaneus	Brazil	São Paulo	Bauru	-22.3	-49.05
Vinicius Tonetti		cajaneus	Brazil	Rondônia	Jirau. Caiçara. MD Madeira	-9.43	-64.82
Vinicius Tonetti		cajaneus	Brazil	Rondônia	Jirau. Caiçara. MD Madeira	-9.43	-64.82
Vinicius Tonetti		cajaneus	Brazil	Rondônia	Jirau. Caiçara. MD Madeira	-9.43	-64.82
WikiAves	814260	avicenniae	Brazil	São Paulo	Guaraú, Peruíbe	-24.37	-47
